# Supplementary material
Source: PubMed Central journal article supplement (PMC4780610)
Supplement: pnas.1517883113.sapp.pdf [file pnas.1517883113.sapp.pdf]

## **Supporting Information (SI):**

Materials and Methods

Supplementary Text

Figures S1-S15

Datasets S1-S8

Supporting Information References

## **Materials and Methods**

The vectors used in this study (SI Appendix, Dataset S5) were constructed using standard molecular cloning techniques, including restriction enzyme digestion, ligation, PCR, and Gibson assembly. Custom oligonucleotides were purchased from Integrated DNA Technologies. The vector constructs were transformed into *E. coli* strain *DH5 $\alpha$* , and 50  $\mu\text{g/ml}$  of carbenicillin (Teknova) was used to isolate colonies harboring the constructs. DNA was extracted and purified using Plasmid Mini or Midi Kits (Qiagen). Sequences of the vector constructs were verified with Genewiz's DNA sequencing service. The constructs for CombiGEM-CRISPR are available to the academic community through Addgene.

To generate a lentiviral vector encoding an shRNA that targeted a specific gene, oligo pairs harboring the sense and antisense sequences were synthesized, annealed, and cloned in the AgeI- and EcoRI-digested pLKO.1 vector (1) (Addgene plasmid #10879) by ligation. The shRNA sense and antisense sequences were designed and constructed based on the siRNA Selection Program (<http://sirna.wi.mit.edu/>), and listed in SI Appendix, Dataset S6.

To create the pAWp30 lentiviral expression vector encoding Cas9 protein and Zeocin as the selection marker, EFS promoter and *Cas9* sequences were amplified from Addgene plasmid #49535, while the *Zeocin* sequence was amplified from Addgene plasmid #25736, by PCR using Phusion DNA polymerase (New England Biolabs). The PCR products were cloned into the pAWp11 lentiviral vector backbone using Gibson Assembly Master Mix (New England Biolabs).

To construct a storage vector containing U6 promoter (U6p)-driven expression of a sgRNA that targeted a specific gene, oligo pairs with the 20 bp gRNA target sequences were synthesized,

annealed, and cloned in the BbsI-digested pAWp28 vector using T4 ligase (New England Biolabs). To construct a lentiviral vector for U6p-driven expression of single or combinatorial gRNA(s), U6p-sgRNA expression cassettes were prepared from digestion of the storage vector with BglII and MfeI enzymes (Thermo Scientific), and inserted into the pAWp12 vector backbone or the sgRNA expression vector, respectively, using ligation via the compatible sticky ends generated by digestion of the vector with BamHI and EcoRI enzymes (Thermo Scientific). To express the gRNAs together with the dual RFP and GFP fluorescent protein reporters, the U6p-driven sgRNA expression cassettes were inserted into the pAWp9, instead of pAWp12, lentiviral vector backbone using the same strategy described above. The pAWp9 vector was modified from the pAWp7 vector backbone by introducing unique BamHI and EcoRI sites into the vector to enable the insertion of the U6p-sgRNA expression cassettes.

### **Assembly of the barcoded combinatorial sgRNA library pool**

We built a library of 153 barcoded sgRNAs targeting a set of 50 genes encoding epigenetic regulators (3 sgRNAs per gene) and 3 control sgRNAs based on the publicly available GeCKOv2 library for genome-wide gene-knockout screening (2) (SI Appendix, Dataset S1). We scanned through the GeCKOv2 library, and found that only a small number (~2.8%) of the gRNAs in the library contained the four restriction sites (i.e., EcoRI, MfeI, BamHI, and BglII) used for CombiGEM assembly. Among the 6 sgRNAs per gene in the GeCKOv2 library, less than 1.8% and 0.15% of genes have more than one and two of their sgRNAs, respectively, that contain any of these four restriction sites. In the library used in this study, only one sgRNA (i.e. PRMT3-sg3) contained an EcoRI recognition site. Our CombiGEM method is therefore compatible with existing gRNA libraries design for conducting large-scale screening experiments. Other restriction enzyme pairs that have compatible ends can also be used to assemble combinatorial gRNA expression vectors with CombiGEM.

An array of 153 oligo pairs (Oligo F-(x) and Oligo R-(x), where x = 1 to 153) harboring the barcoded gRNA sequences were synthesized, and annealed to create double-stranded inserts harboring the 20 bp gRNA target sequences, two BbsI restriction sites, 8 bp barcodes unique to each sgRNA while differed from each other by at least two bases, and 5' overhangs at their ends. To generate the pooled storage vector library, the 153 annealed inserts were mixed at equal ratios

and cloned in the pAWp28 storage vector (digested with BbsI and MfeI) via a single pot of ligation reaction via their compatible ends. To build the barcoded sgRNA library, another one-pot ligation reaction was performed with the pooled storage vector library digested with BbsI, and an insert containing the gRNA scaffold sequence, BamHI and EcoRI restriction sites, and 5' overhangs at their ends that was prepared via synthesis and annealing of an oligo pair S1 and S2. The sequences of oligo S1 and S2 were 5'-

GTTTTAGAGCTAGAAATAGCAAGTTAAAATAAGGCTAGTCCGTTATCAACTTGAAAAA  
GTGGCACCGAGTCGGTGCTTTTTTGGATCCGCAACGGA-3' and 5'-

GAATTCGTTGCGGATCCAAAAAGCACCGACTCGGTGCCACTTTTTCAAGTTGATA  
ACGGACTAGCCTTATTTAACTTGCTATTTCTAGCTCTA-3', respectively. The pooled storage vector and the barcoded sgRNA libraries were both prepared in Endura competent cells (Lucigen) and purified by the Plasmid Midi Kit (Qiagen). We confirmed that 97% (i.e., 32/33 *E. coli* colonies) of randomly picked colonies from the barcoded sgRNA storage pool harbored the correct gRNA target sequences via Sanger sequencing.

Pooled lentiviral vector libraries harboring single or combinatorial gRNA(s) were constructed with same strategy as for the generation of single and combinatorial sgRNA constructs described above, except that the assembly was performed with pooled inserts and vectors, instead of individual ones. Briefly, the pooled U6p-sgRNA inserts were generated by a single-pot digestion of the pooled storage vector library with BglII and MfeI. The destination lentiviral vector (pAWp12) was digested with BamHI and EcoRI. The digested inserts and vectors were ligated via their compatible ends (i.e., BamHI + BglII & EcoRI + MfeI) to create the pooled one-wise sgRNA library (153 sgRNAs) in lentiviral vector. The one-wise sgRNA vector library was digested again with BamHI and EcoRI, and ligated with the same U6p-sgRNA insert pool to assemble the two-wise sgRNA library (153 x 153 sgRNAs = 23,409 total combinations). After the pooled assembly steps, the sgRNAs were localized to one end of the vector construct and their respective barcodes were concatenated at the other end. The lentiviral sgRNA library pools were prepared in XL10-Gold ultracompetent cells (Agilent Technologies) and purified by Plasmid Midi Kit (Qiagen). Sanger sequencing analysis revealed that the majority of *E. coli* colonies with the assembled barcoded sgRNA constructs harbored the expected gRNA target sequences in both the one-wise (i.e., 8/8 colonies) and the two-wise (i.e., 15/18 colonies)

lentiviral vector libraries.

### **Cell culture**

HEK293T, MDA-MB-231, and BxPC-3 cells were obtained from ATCC. OVCAR8-ADR cells were a gift from T. Ochiya (Japanese National Cancer Center Research Institute, Japan). The identity of the OVCAR8-ADR cells was authenticated (Genetica DNA Laboratories). OVCAR8-ADR, MDA-MB-231, and BxPC-3 cells stably expressing Cas9 protein (i.e., OVCAR-ADR-Cas9, MDA-MB-231-Cas9, and BxPC-3-Cas9 cells) were generated by lentiviral infection of their parental cells with the pAWp30 vector and selected for three weeks with Zeocin (Life Technologies) at 50 µg/ml (for BxPC-3-Cas9 cells) or 200 µg/ml (for OVCAR-ADR-Cas9 and MDA-MB-231-Cas9 cells). HEK293T cells were cultured in DMEM supplemented with 10% heat-inactivated fetal bovine serum and 1X antibiotic-antimycotic (Life Technologies) at 37°C with 5% CO<sub>2</sub>. OVCAR8-ADR, MDA-MB-231, BxPC-3, and their respective Cas9-expressing cells were cultured in RPMI supplemented with 10% heat-inactivated fetal bovine serum and 1X antibiotic-antimycotic at 37°C with 5% CO<sub>2</sub>. For drug treatment, SD70 (Xcessbio #M60194), GSK-J4 (Cayman Chemical #12073), and/or (+)-JQ1 (Cayman Chemical #11187) were used to treat OVCAR8-ADR cells at indicated drug doses prior to the cell viability assays.

### **Lentivirus production and transduction**

Lentiviruses were produced and packaged in HEK293T cells in 6-well format. HEK293T cells were maintained at ~70% confluency before transfection. FuGENE HD transfection reagents (Promega) were mixed with 0.5 µg of lentiviral vector, 1 µg of pCMV-dR8.2-dvpr vector, and 0.5 µg of pCMV-VSV-G vector in 100 µl of OptiMEM medium (Life Technologies), and were incubated for 15 minutes at room temperature before adding to cell culture. Culture medium was replaced the next day. Supernatant containing newly produced viruses were collected at 48-hour and 96-hour post-transfection, and filtered through a 0.45 µm polyethersulfone membrane (Pall). Filtered viral supernatant was used to infect cells in the presence of 8 µg/ml polybrene (Sigma) overnight for transduction with individual vector constructs. For pooled lentiviral library production used in the screens, lentivirus production and transduction were scaled up using the same experimental procedures. Filtered viral supernatant was concentrated using Amicon Ultra Centrifugal Filter Unit (Millipore). Cells were infected in the presence of 8 µg/ml polybrene at a



multiplicity of infection of about 0.3 to 0.5 to ensure single copy integration in most cells, which corresponded to an infection efficiency of 30-40%. The total number of cells used in the screening was approximately 300-fold more than the library size in order to maintain library coverage and reduce any spurious effects due to random lentiviral integration into the genome. Cell culture medium was replaced the next day after infection and cultured for indicated time periods prior to experiments.

### **Sample preparation for barcode sequencing**

To prepare samples from cultured cells for barcode sequencing, genomic DNA was extracted and prepared using DNeasy Blood & Tissue Kit (Qiagen) according to the manufacturer's protocol. For the barcoded sgRNA plasmid libraries, plasmid DNA transformed into *E. coli* was extracted using the Plasmid Midi Kit (Qiagen). DNA concentrations were determined using Quant-iT PicoGreen dsDNA Assay Kit (Life Technologies).

A ~360 bp fragment containing unique barcode representing each combination within the pooled vector and infected cell libraries was PCR amplified from the plasmid/genomic DNA samples using KAPA HiFi Hotstart Ready Mix (Kapa Biosystems). For plasmid DNA, 1 ng of DNA template was added for a 25- $\mu$ l PCR reaction. For genomic DNA, 800 ng of DNA was added for a 50- $\mu$ l PCR reaction and a total of 64 PCR reactions were performed for each genomic DNA sample to ensure that the number of cell genomes being amplified was more than 100 times the library size. Moreover, the PCR parameters were optimized to ensure that PCR amplification steps were maintained in the exponential phase to avoid PCR bias. The Illumina anchor sequences and an 8 base-pair indexing barcode were added during the PCR for multiplexed sequencing. The primer pair sequences used to amplify barcode sequence were 5'-AATGATACGGCGACCACCGAGATCTACACGGATCCGCAACGGAATTC-3' and 5'-CAAGCAGAAGACGGCATAACGAGATNNNNNNNNGGTTGCGTCAGCAAACACAG-3', where NNNNNNNN indicates a specific indexing barcode assigned for each experimental sample.

The PCR products containing the barcode sequences were then purified based on fragment size

by running on a 1.5% agarose gel and further extracted using the QIAquick Gel Extraction Kit (Qiagen). The PCR product concentrations were determined by quantitative PCR using KAPA SYBR Fast qPCR Master Mix (Kapa Biosystems) and the Illumina Library Quantification Kit (Kapa Biosystems). The forward and reverse primer used for quantitative PCR were 5'-AATGATACGGCGACCACCGA-3' and 5'-CAAGCAGAAGACGGCATAACGA-3' respectively. The PCR products from different samples were then pooled at a desired ratio for multiplexed sample sequencing and loaded on the Illumina HiSeq system with CombiGEM barcode primer (5'-CCACCGAGATCTACACGGATCCGCAACGGAATTC-3') and indexing barcode primer (5'-GTGGCGTGGTGTGCACTGTGTTTGCTGACGCAACC-3').

### **Barcode sequencing data analysis**

Barcode reads for each gRNA combinations were processed from the Illumina sequencing data. Each sample was categorized by the indexing barcodes. The barcoded gRNA combinations were relatively evenly distributed in the libraries, with the majority of the barcoded sgRNAs (i.e., 96.7% in the one-wise plasmid pool; 89.4% and 92.3% in the two-wise plasmid and the 5-day post-infected cell pools, respectively) detected within a 5-fold range from the mean barcode reads per combination (SI Appendix, Fig. S3A, B). Less than 5.8% and 4.2% of the gRNA combinations were covered by <100 reads in the two-wise plasmid and infected cell pools, respectively (SI Appendix, Fig. S3A, B).

In the pooled screen, we correlated the proliferation rate of a particular clone based on the relative frequency of its barcode with regard to the whole population. Barcode reads representing each combination were normalized per million reads for each sample. As measures of cell proliferation, barcode count ratios of normalized barcode reads comparing day 20 against day 15 groups were calculated as fold changes. Pro-proliferation and anti-proliferation phenotypes had fold changes of normalized barcode reads of  $> 1$  and  $< 1$  respectively, while no phenotypic change resulted in a fold change = 1. Barcodes that gave less than ~100 absolute reads in the day 15 group were filtered out to improve data reliability. Data variability could be further reduced by increasing the fold representation of cells per combination in the pooled screen (3). The fold changes of the different possible orders of each same gRNA combination were averaged, and a

coefficient of variation (CV) of  $< 0.2$  and  $< 0.4$  was observed for over 82% and 95% of the combinations, respectively (SI Appendix, Fig. S8). The calculated fold change was log transformed to give the  $\log_2$  ratio. Screens were performed in two biological replicates with independent infections of the same lentiviral libraries. Combinations were ranked by the  $\log_2$  ratio across all experimental conditions. We defined the set of top hits based on two criteria: 1)  $\log_2$  ratios that were less than  $-0.90$  (i.e., at least three standard deviations from the mean of gRNA combinations harboring only the control sgRNAs that are highlighted in orange in Fig. 2B and SI Appendix, Fig. S9) in both biological replicates, and 2) recovered at a low false-discovery rate (FDR). The P-value for the  $\log_2$  ratio of each combination was computed by comparing the  $\log_2$  ratio with those contained within the whole population obtained from the two replicates using the two-sample, two-tailed Student's t-test (MATLAB function 'ttest2'). The distribution of the  $\log_2$  ratios is shown in SI Appendix, Fig. S9B. The adjusted P-values (i.e., Q-values) were calculated based on the distribution of P-values (MATLAB function 'mafdr'(4)) to correct for multiple hypothesis testing. A  $\log_2$  ratio was considered as statistically significant relative to the entire population based on a Q-value cutoff at  $< 0.01$ . The list of two-wise gRNA hits are shown in SI Appendix, Dataset S4, and are highlighted in blue in Fig. 2B and SI Appendix, Fig. S9A, C. For further analysis, our screen data are included in SI Appendix, Datasets S7 and S8.

### **Cell viability assay**

The MTT colorimetric assay was performed to assess cell viability. For each 96 well, 100  $\mu$ l of MTT (3-(4,5-dimethylthiazol-2-yl)-2,5-diphenyltetrazolium bromide) solution (Sigma) was added to the cell cultures. Cells were incubated for 3 hours at 37°C with 5% CO<sub>2</sub>. Viable cells convert the soluble MTT salt to insoluble blue formazan crystals. Formazan crystals were dissolved with 100  $\mu$ l of solubilization buffer at 37°C. Absorbance reading at an optical density (OD) of 570nm and 650nm (reference) were measured using a Synergy H1 Microplate Reader (BioTek).

### **Drug synergy quantification**

The Bliss independence (BI) model (5) and the Highest Single Agent (HSA) model (6) are commonly used methods to evaluate synergy between drug combinations.

Based on the BI model, the expected effect ( $E_{Exp}$ ) is given by:

$$E_{Exp} = E_A + E_B - (E_A \times E_B),$$

where  $E_A$  is the growth inhibition effect observed at a certain concentration of drug A alone, and  $E_B$  is the growth inhibition effect observed at a certain concentration of drug B alone.  $E_{Obs}$  is the observed growth inhibition effect for the drug combination (A + B), each at the same concentration as in  $E_A$  and  $E_B$ , respectively. Each effect is expressed as a fractional inhibition between 0 and 1. When  $E_{Obs} - E_{Exp} > 0$ , the two drugs are considered to be interacting synergistically.

The HSA model is similar to the BI model except, according to the HSA model,  $E_{Exp}$  is equal to the larger of the growth inhibition effect produced by the combination's single drug agents ( $E_A$  or  $E_B$ ) at the same concentrations as in the drug combination (A + B).

We considered two drugs to be synergistic if  $E_{Obs} - E_{Exp} > 0.1$  (i.e. > 10% of excess inhibition over the predicted BI and HSA models in Fig. 3C, D) for at least two different concentration combinations in both models to enhance the stringency of our criteria.

### **Flow cytometry**

Cells were collected at 4-day and 8-day post infection. Samples were washed and resuspended in 1x PBS supplemented with 2% fetal bovine serum. To remove any clumps of cells, the resuspended cells were passed through cell strainers before loading onto the LSRII Fortessa flow cytometer (Becton Dickinson). At least 20,000 events were acquired per sample. Proper laser sets and filters were selected based on cell samples. Forward scatter and side scatter were used to identify appropriate cell populations. Data were analyzed using the manufacturer's built-in software.

### **Fluorescence microscopy**

Cultured cell were directly observed under an inverted fluorescent microscope (Zeiss) three days post-lentiviral infection. Images were captured using the Zeiss built-in software.

### **Quantitative PCR (qRT-PCR)**

RNA extraction and qRT-PCR were performed as described previously (7). Primers used are listed in SI Appendix, Dataset S2.

### **Immunoblot analysis**

Cells were lysed in 2X RIPA buffer supplemented with protease inhibitors. Lysates were homogenized using a pestle motor mixer (Agros) for 30 seconds, and then centrifuged at 15,000 rpm for 15 min at 4°C. Supernatants were quantified using the BCA assay (Thermo Scientific). Protein was denatured at 99°C for 5 minutes before gel electrophoresis on a 4-15% polyacrylamide gel (Bio-Rad). Proteins were transferred to nitrocellulose membranes at 80V for 2 hours at 4°C. Primary antibodies used were: anti-BRD4 (1:2,000, Cell Signaling #13440), anti-KDM4C (1:1,000, Abcam ab85454) anti-KDM6B (1:1,000, Abcam ab85392), and anti-beta-actin (1:4,000, Abcam ab6276). Secondary antibodies used were: HRP-linked anti-rabbit IgG (1:2,000, Cell Signaling #7074), and HRP-linked anti-mouse IgG (1:4,000, Cell Signaling #7076). Membranes were developed by SuperSignal West Pico chemiluminescent substrate (Thermo Scientific) and imaged using a ChemiDoc Touch imaging system (BioRad).

### **Surveyor assay**

The Surveyor assay was carried out to evaluate DNA mismatch cleavage at genomic loci targeted by the gRNAs. Genomic DNA was extracted from cell cultures using QuickExtract DNA extraction solution (Epicentre) according to the manufacturer's protocol. Amplicons harboring the targeted loci were generated by PCR using Phusion DNA polymerase and primers listed in SI Appendix, Dataset S9. About 200 ng of the PCR amplicons were denatured, self-annealed, and incubated with 1.5 µl of Surveyor Nuclease (Transgenomic) at 42°C for 30 minutes. The samples were then analyzed on a 2% agarose gel. The expected uncleaved and cleaved bands for the targeted alleles studied in this work are listed in SI Appendix, Fig. S4.

### **Sequencing analysis for indel detection**

Deep sequencing was performed to measure indel generation efficiency at genomic loci targeted by the gRNAs. Genomic DNA was extracted from cell cultures using DNeasy Blood & Tissue

Kit (Qiagen) according to the manufacturer's protocol. 66 ng of genomic DNA isolated from ~10,000 OVCAR8-ADR-Cas9 cells harboring the gRNA expression construct was used as the template for the first round of PCR using Phusion DNA polymerase and primers listed in SI Appendix, Dataset S10 to amplify each of the on-target and off-target loci and add priming sequences for the second round of PCR. Potential off-target loci were identified for individual gRNAs using the CRISPR design (8) (<http://tools.genome-engineering.org>) and CCTop (9) (<http://crispr.cos.uni-heidelberg.de>) prediction tools. The ~250 bp PCR product was purified using QIAquick PCR Purification Kit (Qiagen). 1 ng of the purified PCR product was then used as the template for the second round of PCR using Phusion DNA polymerase. The Illumina anchor sequences and a 6 base-pair indexing barcode were added during the second round of PCR for multiplexed sequencing. The primer pair sequences were 5'-AATGATACGGCGACCACCGAGATCTACACTCTTTCCCTACACGACGCTCTTCCGATCT-3' and 5'-CAAGCAGAAGACGGCATAACGAGATNNNNNNGTGACTGGAGTTCAGACGTGTGCTCTTCCG-3', where NNNNNN indicates a specific indexing barcode assigned for each experimental sample. The ~300 bp PCR amplicon was then purified based on fragment size by running on a 1.5% agarose gel and extracted using the QIAquick Gel Extraction Kit (Qiagen). The purified PCR amplicons from each experimental sample were pooled at a 1:1 ratio, and loaded on the Illumina MiSeq system for paired-end sequencing. The paired-end read primers were 5'-ACACTCTTTCCCTACACGACGCTCTTCCGATCT-3' and 5'-GTGACTGGAGTTCAGACGTGTGCTCTTCCGATCT-3', and the indexing barcode primer was 5'-AGATCGGAAGAGCACACGTCTGAACTCCAGTCAC-3'. Sequencing data was demultiplexed using the indexing barcodes, aligned to the reference amplicon sequences obtained from uninfected OVCAR8-ADR-Cas9 cells, and analyzed for indels. More than 4.2 million reads per sample were used to evaluate the genomic diversity of the ~10,000 cells. Indel generation preference was evaluated by plotting the frequency of indel sizes for a given locus. The sequence alignment for the barcoded reads was performed using a custom written C++ code implementing the Needleman-Wunsch algorithm. Indel frequency calculation and plotting was performed on Matlab.

Sanger sequencing was performed to analyze the genome modifications generated by the

expression of combinatorial gRNAs in single-cell-derived clones. Cells infected with the combinatorial gRNA constructs were cultured for 12 days, and re-plated in 96-well plates as single cells by serial dilution of the cultures. Genomic DNA was extracted from the isolated single cell-expanded clones after culturing for 5 to 21 days using QuickExtract DNA extraction solution, and amplicons harboring the targeted alleles were prepared by PCR using Phusion DNA polymerase and primers listed in SI Appendix, Dataset S9. The PCR amplicons were cloned into a TOPO vector using TA Cloning Kit (Life Technologies) according to the manufacturer's protocol, and the nucleotide mutations, insertions, and deletions were identified using Sanger sequencing.

To analyze indel generation by the expression of combinatorial gRNAs at the single-cell level, targeted allele sequencing was performed on whole genome-amplified DNA from individual cells. OVCAR8-ADR-Cas9 cells harboring combinatorial gRNA expression constructs were cultured for 19 days, and sorted into 96-well plates as single cells using a FACS Aria sorter (Becton Dickinson). Whole genome amplification (WGA) was then performed using the REPLI-g Single Cell Kit (Qiagen) according to the manufacturer's recommendations. Next, PCR enrichment of the targeted genomic loci was performed using KAPA HiFi Hotstart Ready Mix and primers listed in SI Appendix, Dataset S11. An Exonuclease I (New England Biolabs) digest was performed at 37°C for 1 hour to remove excess primers and then a second round of PCR was performed to add sequencing adaptors and unique index barcodes to each sample. The latter primer sequences were 5'-

CAAGCAGAAGACGGCATAACGAGATNNNNNNNNGTCTCGTGGGCTCGGAGATGTGTAT  
AAGAGACAG -3' (N7XX) and 5'-

AATGATACGGCGACCACCGAGATCTACACNNNNNNNNTCGTCGGCAGCGTCAGATGT  
GTATAAGAGACAG -3' (N5XX), where NNNNNNNN indicates a specific index barcode assigned for each well. To prepare the sequencing library, 5 µl of PCR product from each well was pooled in a 1.5 ml microcentrifuge tube. The total volume was measured, and 0.9 volumes of Agencourt AMPure XP SPRI beads (Beckman Coulter) were added. After mixing, the bead suspension was incubated for 5 minutes at room temperature and then placed on a DynaMag-2 magnet for 5 minutes. The supernatant was removed and the beads were washed twice with 500 µl of 80% ethanol. After drying, DNA was eluted from the beads with 30 µl of TE buffer. A

reverse SPRI was then performed to remove the larger-sized DNA fragments: here, 0.5 volumes of SPRI beads was added to the eluent, and, after mixing, the supernatant was transferred to a new 1.5 ml microcentrifuge tube. At this point, one volume of SPRI beads was then added to the supernatant, the sample was mixed, and, after separation with a magnet, the beads were rinsed twice with 80% ethanol and air-dried before collecting the eluent in 30  $\mu$ l of TE buffer. The purified library was then sequenced on an Illumina MiSeq instrument using a 300-cycle v3 kit (pair-end read: 200 bp for read 1, 100 bp for read 2). Sequencing reads were demultiplexed for each cell based on the barcodes. The sequences in each cell were counted and were aligned against the reference wild-type sequences to determine the frequency of single- and dual- gene edited cells.

### **RNA-Seq and data analysis**

RNA was extracted from cells using TRIzol Plus RNA Purification Kit (Life Technologies) according to the manufacturer's protocol and treated with PureLink on-column DNase kit (Life Technologies). RNA quality and concentration was determined using NanoDrop Spectrophotometer. RNA samples were reverse-transcribed using SuperScript III Reverse Transcriptase (Life Technologies), Random Primer Mix (New England Biolabs) and RNase OUT (Invitrogen). Sequencing libraries were prepared using the Illumina Library Prep Kit, starting with an input amount of 1  $\mu$ g total RNA and following the manufacturer's recommendations. After PCR amplification, the libraries were size-selected to 300 +/- 25 bp on a 2% agarose gel (E-Gel EX, Invitrogen) and submitted to single-end sequencing on an Illumina HiSeq 2000 instrument. RNA-Seq experiments were performed in two biological replicates.

Raw single-end reads of the cDNA fragments were aligned to the human transcriptome (RefSeq, hg19) using TopHat2 (10) and Bowtie (11). Differentially expressed genes between samples were called using Cuffdiff2 (12) with the bias correction option, masking reads mapping to mitochondrial and ribosomal RNA transcripts. Genes were called differentially expressed if they met a minimum of 0.1 fragments per kilobase per million reads (FPKM) in at least one of the conditions tested, the absolute  $\log_2$ -fold-change was at least 0.5, and the P-value after multiple hypothesis correction (Q-value) was less than 0.05. Gene set enrichment analysis was performed using MSigDB database (<http://www.broadinstitute.org/gsea/index.jsp>) (13). All RNA-Seq data



has been deposited in the Gene Expression Omnibus (GEO) database ([www.ncbi.nlm.nih.gov/geo](http://www.ncbi.nlm.nih.gov/geo); accession no. GSE71074).

### **Mathematical modeling of cell proliferation in a mixed population**

To estimate how different parameters affect results in our pooled screens, we simulated cell proliferation in a mixed cell population harboring gRNA combinations that exhibit different growth rates. At a given time ( $t$ ), the total cell count ( $C_N$ ) in the population is represented by the summation of individual cell counts containing different combinations ( $C_i$ ; 1 to  $N$ , where  $N$  is the total number of combinations), such that  $C_N(t) = \sum_{i=1}^N C_i(t)$ .

For each individual gRNA combination, cell growth is represented by Eq. (1). Based on an exponential cell growth model, cells with each gRNA combination consist of two populations: one with a modified growth rate ( $k_m$ ) due to gene disruption by the CRISPR-Cas9 system, and the other (unmodified cells) with the wild-type growth rate ( $k_{wt}$ ). The former population is defined as a fraction of cells,  $p$ , which is limited by the cleavage efficiency of the CRISPR-Cas9 system. For simplicity, we assumed that  $p$  was constant throughout the duration of the assay.

$$C_i(t) = p C_i(t) + (1 - p)C_i(t) = pC_0e^{k_mt} + (1 - p)C_0e^{k_{wt}t} \quad (\text{Eq. 1})$$

where  $p$  represents the fraction of mutated cells with a modified growth rate, and  $C_0$  represents the initial number of cells carrying the same barcoded gRNA combination. The cell growth rate ( $k$ ) is evaluated from the cell's doubling time ( $T_{doubling}$ ) following Eq. 2. The doubling time for wild-type OVCAR8-ADR-Cas9 cells was experimentally determined to be ~24 hours (data not shown).

$$k = \ln 2 / T_{doubling} \quad (\text{Eq. 2})$$

For simplicity in modeling, we segregated the total cell population into three sub-populations with different growth phenotypes as described in Eq. (3).

$$C_N(t) = \sum_{i=1}^N C_i(t) \approx f_{wt}N \times C_0 e^{k_{wt}t} + f_s N \times C_{i,slow}(t) + f_f N \times C_{i,fast}(t) \quad (\text{Eq. 3})$$

where  $C_{i,slow}(t)$  and  $C_{i,fast}(t)$  represent the average growth profiles of cells with anti-proliferative gRNAs and pro-proliferative gRNAs, respectively, which are determined by Eq. (1). At the start of the experiment, the percentages of the overall population that behave as wild type or that contain anti-proliferative gRNAs and pro-proliferative gRNAs are represented by  $f_{wt}$ ,  $f_s$  and  $f_f$ , respectively.

Based on this mixed cell growth model, we modeled the relative frequency ( $R. F.$ ) of a pro-proliferative gRNA's and an anti-proliferative gRNA's representation in the whole population. The relative frequency is defined as the barcode abundance at a given time compared to the initial time point (i. e.,  $R. F. = \frac{F(t)}{F(t=0)}$ , where  $F = C_i(t)/C_N(t)$ ). The total number of combinations in a pool,  $N$  and the initial number of cells,  $C_0$ , do not impact the relative frequency results. After running the simulation with defined parameters, we observed enrichment and depletion of a pro-proliferative gRNA and anti-proliferative gRNA in the population, respectively (SI Appendix, Fig. S7A). The degree of enrichment and depletion was observed to change with different percentages (i.e., 2, 5, or 10%) of initial gRNA combinations defined to have an anti-proliferative ( $f_s$ ) and pro-proliferative ( $f_f$ ) response (SI Appendix, Fig. S7A). We further evaluated the relative frequency of an anti-proliferative gRNA's representation by modulating the doubling time of modified cells ( $T_{doubling,m}$ ) and the fraction of cells with the modified growth rate ( $p$ ) for the anti-proliferative gRNA. Assuming that  $p$  stayed constant throughout the experiment, the representation of an anti-proliferative clone in the entire cell population could be depleted by ~23% to 97% under the parameter ranges shown in SI Appendix, Fig. S7B, C. This model represents a simplified version of cell growth dynamics by segregating cell populations into sub-populations with average growth rates and does not account for potential interactions between cells. Based on our model, the sensitivity of our screen could be enhanced with improved gRNA efficiencies to increase the fraction of cells with modified growth rates and by increasing the assay time.

## Supplementary Text

### Author Contributions

A.S.L.W., G.C.G.C., and T.K.L. conceived the work. A.S.L.W., G.C.G.C., C.H.C., and T.K.L. designed and performed the experiments with help from all authors. A.S.L.W., G.C.G.C., and T.K.L. designed and developed the combinatorial genetic screening pipeline. A.S.L.W., G.C.G.C., and C.H.C. performed the combinatorial genetic screening, computational analyses on the screen data, and validation experiments. G.C.G.C. and A.S.L.W. performed the drug synergy experiments. A.S.L.W., C.H.C., S.D.P., and M.H. performed deep sequencing and analyzed CRISPR on- and off-targeting effects. A.S.L.W. and G.C.G.C. performed the targeted sequencing of single-cell-derived clones. C.H.C., S.W.K., A.G., A.S.L.W., and A.K.S. performed the single-cell WGA analysis. G.C.G.C., G.P., P.M., M.A., A.S.L.W., and E.F. performed the RNA-Seq experiments and analyzed the data. C.H.C. performed the mathematical modeling of mixture cell growth. A.S.L.W., G.C.G.C., C.H.C., and T.K.L. wrote the manuscript with help from all authors.

**Fig. S1**

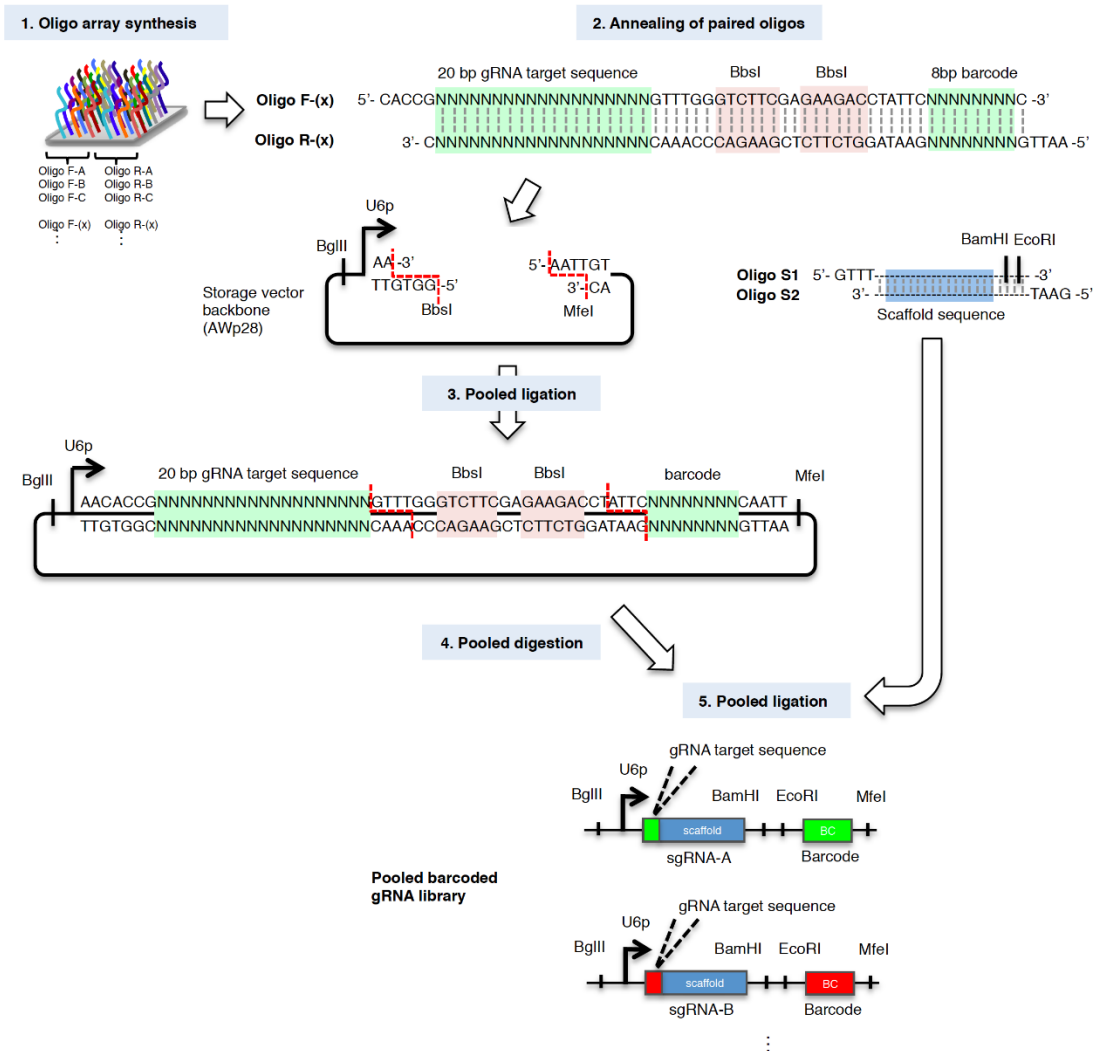

**Fig. S1. Strategy for Assembling the Barcoded gRNA Library Pool.** Forward and reverse oligo pairs (Oligo-F and Oligo-R, respectively) were synthesized and annealed to create double-stranded inserts with 20 bp gRNA target sequences, two BbsI sites, 8 bp barcodes, and 5' overhangs at their ends. To create the pooled storage vector library, the annealed inserts were mixed in 1:1 ratio and cloned in the storage vector (digested with BbsI and MfeI) with a one-pot ligation reaction via their compatible ends. To create the barcoded gRNA library pool, another single-pot ligation reaction was performed with the pooled storage vector library digested with BbsI, and an insert containing the gRNA scaffold sequence, BamHI and EcoRI sites, and 5' overhangs at their ends, which was generated via synthesis and annealing of Oligos S1 and S2.

**Fig. S2**

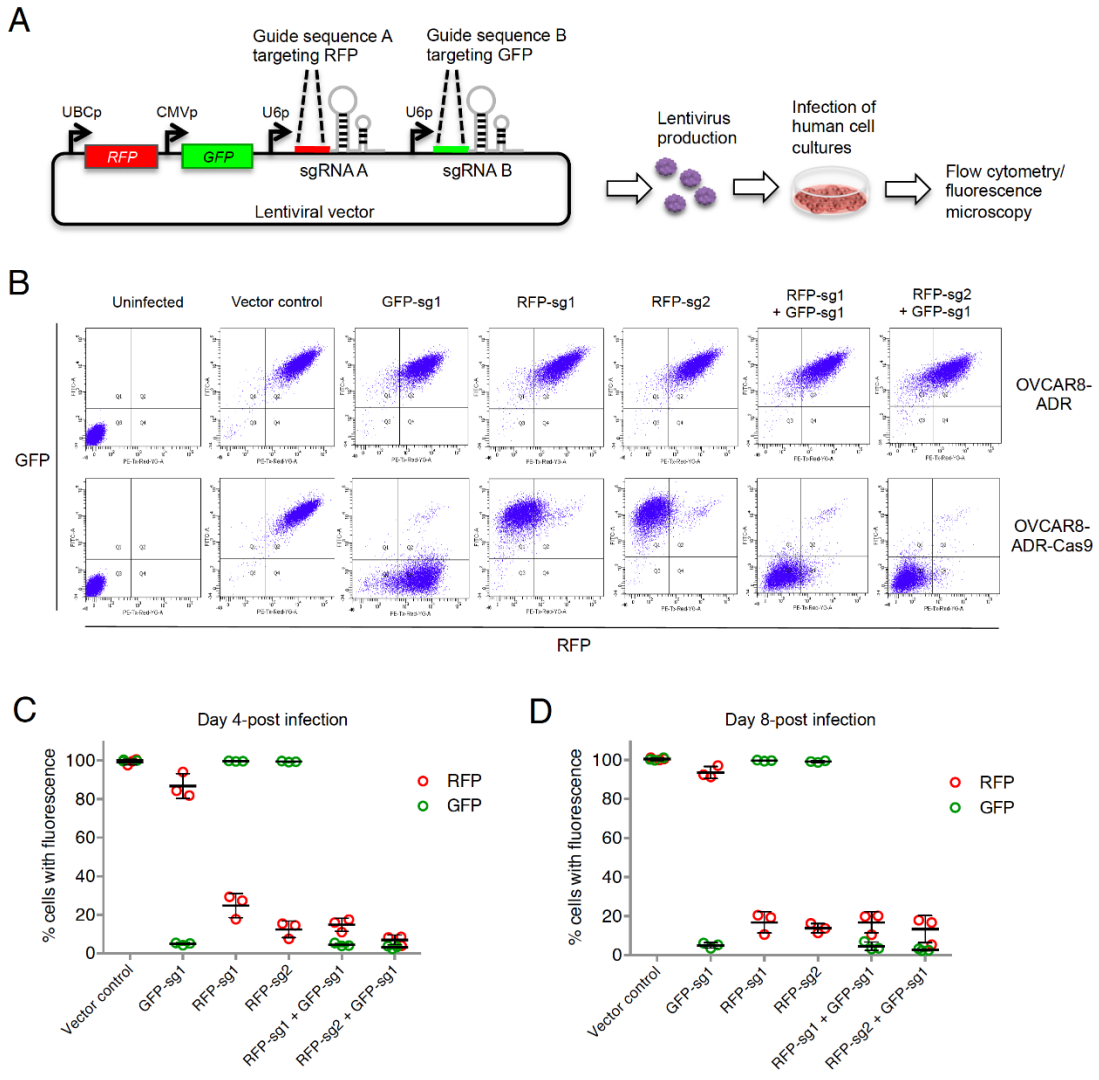

E

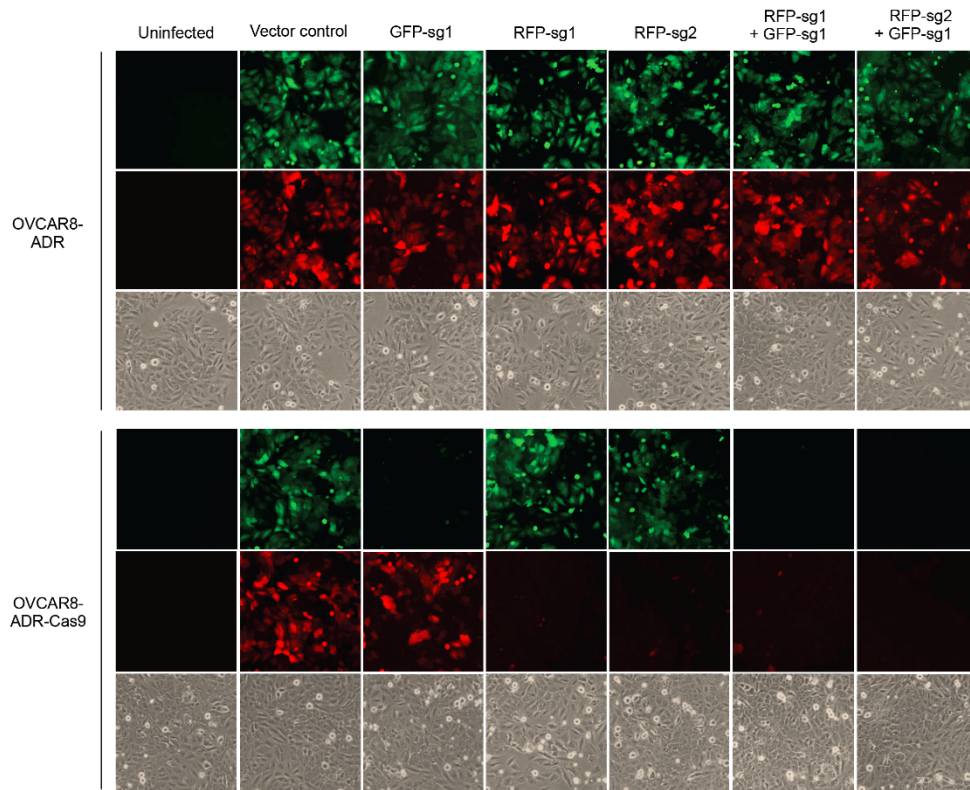

**Fig. S2. Lentiviral Delivery of Combinatorial gRNA Expression Constructs Provides Efficient Target Gene Repression.** (A) Strategy for testing lentiviral combinatorial gRNA expression constructs in human cells. We generated lentiviruses that contained *RFP* and *GFP* genes expressed from UBC and CMV promoters, respectively, and tandem U6 promoter-driven expression cassettes of gRNAs targeting *RFP* (RFP-sg1 or RFP-sg2) and *GFP* (GFP-sg1) sequences. These lentiviruses were delivered to OVCAR8-ADR or OVCAR8-ADR-Cas9 cells for analysis of GFP and RFP expression under flow cytometry and fluorescence microscopy. (B to D) Flow cytometry was used to measure cell populations positive for RFP and GFP fluorescence. Lentiviruses encoding combinatorial gRNA expression constructs reduced the percentage of cells positive for RFP and GFP fluorescence in OVCAR8-ADR-Cas9, but not OVCAR8-ADR, cells (B). The percentages of RFP- and GFP- positive cells were determined by flow cytometry at day 4 (C) and day 8 (D) post-infection. Limited cross-reactivity between sgRNAs targeting *RFP* and *GFP* were detected. Data in (B) represents flow cytometry measurements for cells infected for 4 days, while quantifications in both (C) and (D) represent

mean  $\pm$  SD ( $n = 3$ ). (E) Fluorescence microscopy revealed that combinatorial gRNA expression constructs effectively repressed RFP and GFP fluorescence levels in OVCAR8-ADR-Cas9, but not OVCAR8-ADR, cells at day 3 post-infection.

**Fig. S3**

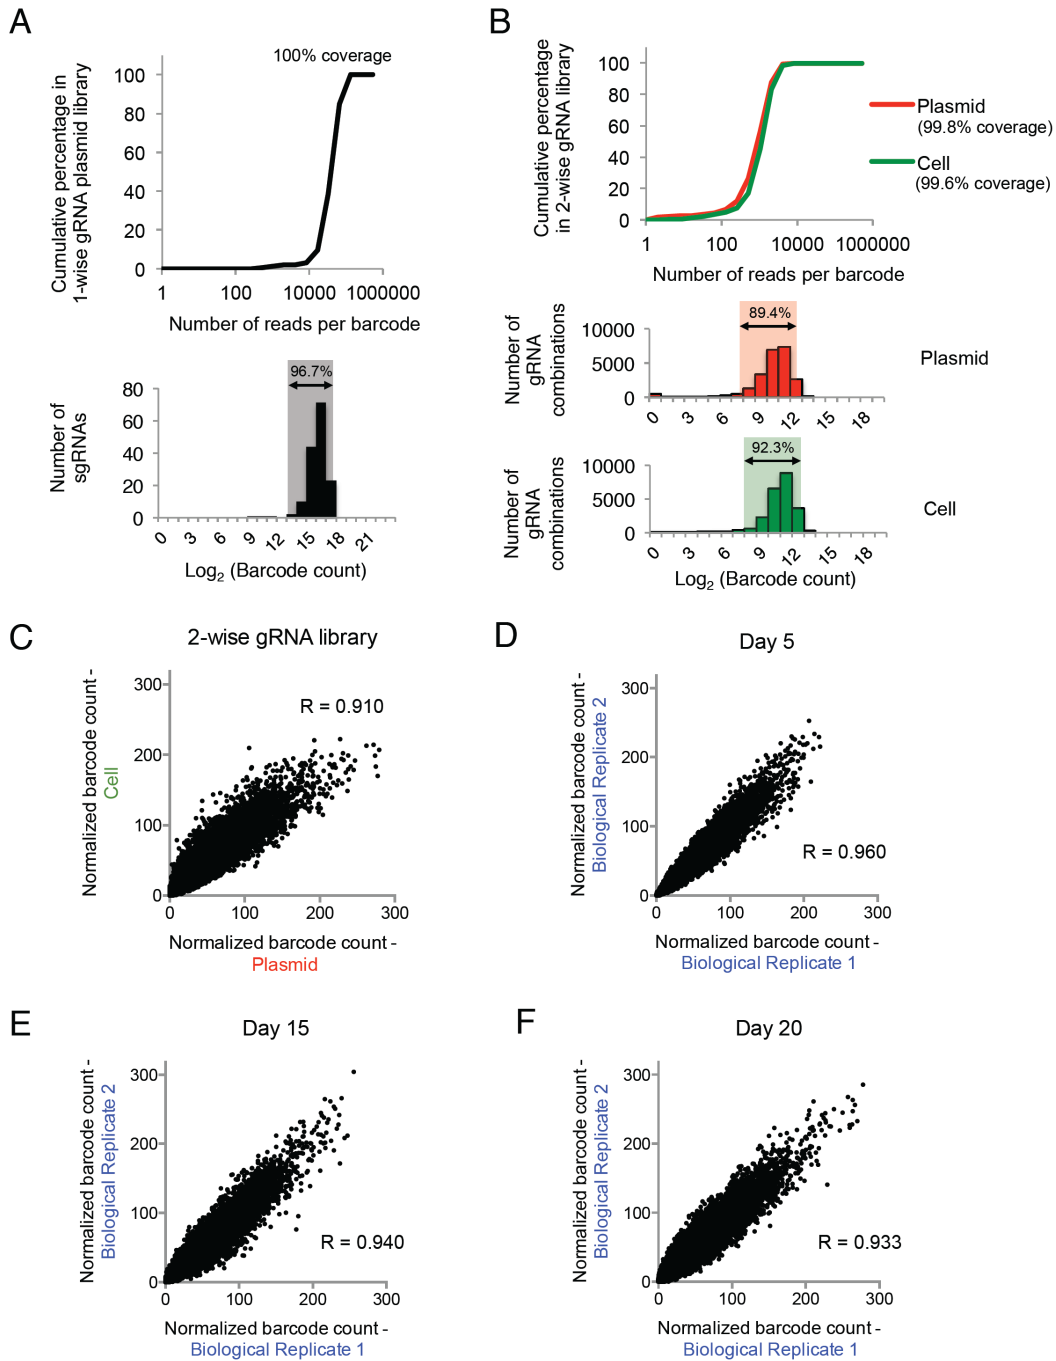

**Fig. S3. Generation of a High-Coverage Combinatorial gRNA Library and Efficient Delivery of the Library to Human Cells.** (A and B) Distributions of barcode reads for a one-wise gRNA library in the plasmid pool extracted from *E. coli* (A) and a two-wise gRNA library in both the plasmid pool and the lentivirus-infected OVCAR8-ADR-Cas9 cell pool (B) indicate high coverage for the expected combinations. Full coverage of all expected sgRNAs was



obtained in the plasmid pool (*A*), while 99.8% (i.e., 23,366 out of 23,409) and 99.6% (i.e., 23,324 out of 23,409) of the expected gRNA pairs were detected within the plasmid and infected cell pools, respectively (*B*). The missing gRNA pairs (i.e., with no barcode read) are listed in SI Appendix, Dataset S7. Most barcoded gRNA combinations were detected within a 5-fold range from the mean barcode reads per combination (highlighted by the shaded areas). (*C*) High correlations between barcode representations (normalized barcode counts) within the plasmid pool and infected OVCAR8-ADR-Cas9 cell pool indicate efficient lentiviral delivery of the two-wise library into human cells. (*D to F*) High reproducibility for barcode representations between two biological replicates in OVCAR8-ADR-Cas9 cells cultured for 5-day (*D*), 15-day (*E*) or 20-day (*F*) post-infection with the two-wise gRNA library.  $R$  is the Pearson correlation coefficient.

**Fig. S4**

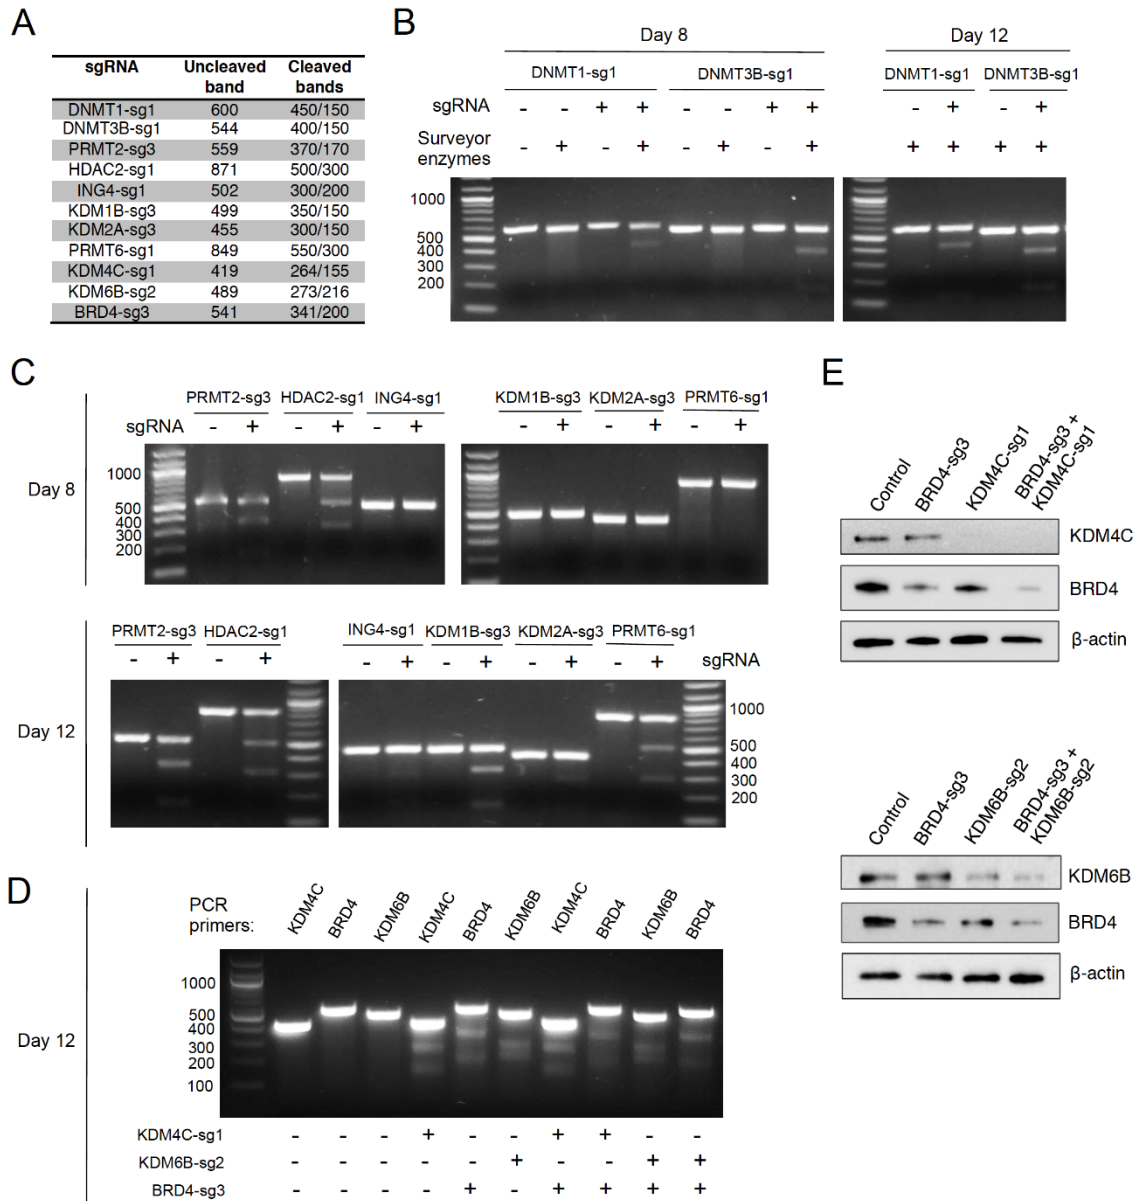

**Fig. S4. Activity of gRNAs at Targeted Genomic Loci in OVCAR8-ADR-Cas9 Cells.** (A) Summary table showing the expected sizes of the uncleaved and cleaved PCR products for the Surveyor assay. (B to D) Agarose gels showing the Surveyor assay results for DNA mismatch cleavage in OVCAR8-ADR-Cas9 cells that were either uninfected or infected with the indicated single- or dual- gRNA expression constructs selected from the screening library after 8 or 12 days post-infection. (E) Immunoblot analysis showing protein levels in OVCAR8-ADR-Cas9 cells that were either infected with vector control, or the indicated single- or dual- gRNA expression constructs for 15 days.

**Fig. S5**

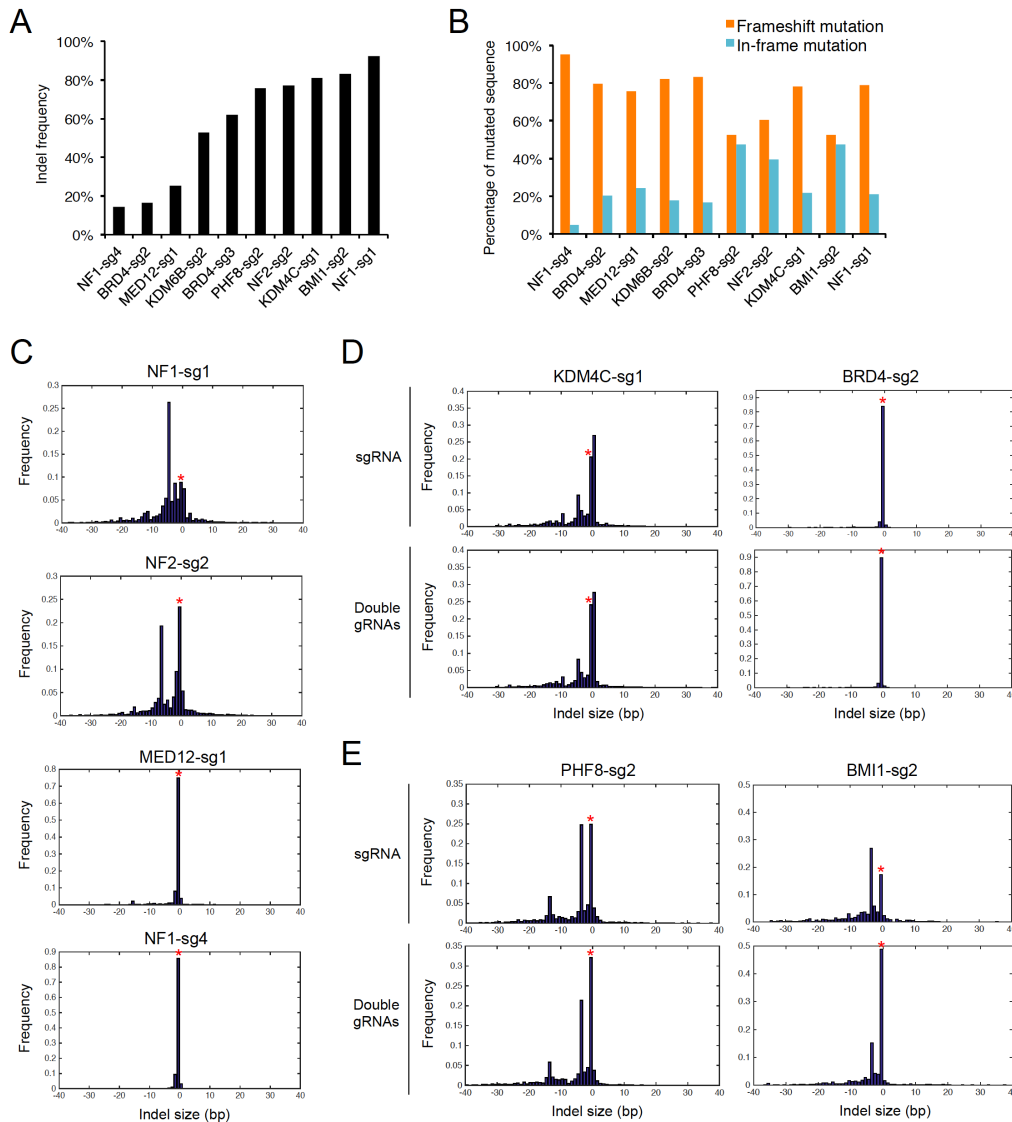

**Fig. S5. Deep Sequencing for Indel Analysis at gRNA-Targeted Genomic Loci in OVCAR8-ADR-Cas9 cells.** (A to C) Targeted genomic loci in OVCAR8-ADR-Cas9 cells infected with the indicated sgRNAs for 15 days were deep sequenced. The indel frequency (A), the percentage of frameshift and in-frame mutations (B), and the distribution of indel sizes (C) are shown. (D and E) The distribution of indels was analyzed by deep sequencing of the targeted genomic loci in OVCAR8-ADR-Cas9 cells that were either infected with the indicated sgRNA or dual-gRNA expression constructs for 15 days. In each sample, more than 4.2 million reads were used to analyze ~10,000 genomes extracted from the infected cells. The bar representing the wild-type sequence (i.e., with no indel) is labeled with a red asterisk in (C-E).

Fig. S6

A

BRD4-sg2 + KDM4C-sg1

|                               |                                                                                                   |                  |       |
|-------------------------------|---------------------------------------------------------------------------------------------------|------------------|-------|
| WT                            | 5' - TAGACATTTGGGAAGTTTCTAGTCCATCCCCATTAC <b>TGGC</b> CAGATTTCTCAATCTCGTCC- 3'                    |                  | BRD4  |
|                               | 5' - GAAGGATAATCACCTTTGCAAGACCCGCACGA <b>TGGG</b> CTCCTTTAGACTCCATGTATGCA- 3'                     |                  | KDM4C |
| Single cell-derived clone #1  | 5' - TAGACATTTGGGAAGTTTCTAGTCCATCCCCATTAC <b>TGGC</b> CAGATTTCTCAATCTCGTCC- 3'                    | WT               | BRD4  |
|                               | 5' - TAGACATTTGGGAAGTTTCTAGTCCATCCCCATTAC <b>TGGC</b> CAGATTTCTCAATCTCGTCC- 3'                    | WT               | WT    |
|                               | 5' - GAAGGATAATCACCTTTGCAAGACCC--ACGA <b>TGGG</b> CTCCTTTAGACTCCATGTATGCA- 3'                     | -2 bp            | KDM4C |
|                               | 5' - GAAGGATAATCACCTTTGCAAGACCC--ACGA <b>TGGG</b> CTCCTTTAGACTCCATGTATGCA- 3'                     | -2 bp            | KDM4C |
| Single cell-derived clone #2  | 5' - TAGACATTTGGGAAGTTTCTAGTCCATCCCCATTAC <b>TGGC</b> CAGATTTCTCAATCTCGTCC- 3'                    | WT               | BRD4  |
|                               | 5' - TAGACATTTGGGAAGTTTCTAGTCCATCCCCATTAC <b>TGGC</b> CAGATTTCTCAATCTCGTCC- 3'                    | WT               | WT    |
|                               | 5' - GAAGGATAATCACCTTTGCAAGACCCG--CGA <b>TGGG</b> CTCCTTTAGACTCCATGTATGCA- 3'                     | -2 bp            | KDM4C |
|                               | 5' - GAAGGATAATCACCTTTGCAAGACCCG--CGA <b>TGGG</b> CTCCTTTAGACTCCATGTATGCA- 3'                     | -2 bp            | KDM4C |
| Single cell-derived clone #3  | 5' - TAGACATTTGGGAAGTTTCTAGTCCATCCCCATTAC <b>TGGC</b> CAGATTTCTCAATCTCGTCC- 3'                    | WT               | BRD4  |
|                               | 5' - TAGACATTTGGGAAGTTTCTAGTCCATC-----C <b>TGGC</b> CAGATTTCTCAATCTCGTCC- 3'                      | -8 bp            | WT    |
|                               | 5' - GAAGGATAATCACCTTTGCAAGACCCGCACGA <b>TGGG</b> CTCCTTTAGACTCCATGTATGCA- 3'                     | WT               | KDM4C |
|                               | 5' - GAAGGATAATCACCTTTGCAAGACCCGC--CGA <b>TGGG</b> CTCCTTTAGACTCCATGTATGCA- 3'                    | -1 bp            | KDM4C |
| Single cell-derived clone #4  | 5' - TAGACATTTGGGAAGTTTCTAGTCCATCCCCATTAC <b>TGGC</b> CAGATTTCTCAATCTCGTCC- 3'                    | WT               | BRD4  |
|                               | 5' - TAGACATTTGGGAAGTTTCTAGTCCATCCCCATTAC <b>TGGC</b> CAGATTTCTCAATCTCGTCC- 3'                    | WT               | WT    |
|                               | 5' - GAAGGATAATCACCTTTGCA <b>AA</b> -----TCCATGTATGCA- 3'                                         | 1 mut.; -25 bp   | KDM4C |
|                               | 5' - GAAGGATAATCACCTTTGCA-----GA <b>TGGG</b> CTCCTTTAGACTCCATGTATGCA- 3'                          | -10 bp           | KDM4C |
| Single cell-derived clone #5  | 5' - TAGACATTTGGGAAGTTTCTAGTCCATCCCCATTAC <b>TGGC</b> CAGATTTCTCAATCTCGTCC- 3'                    | WT               | BRD4  |
|                               | 5' - TAGACATTTGGGAAGTTTCTAGTCCATCCCCATTAC <b>TGGC</b> CAGATTTCTCAATCTCGTCC- 3'                    | WT               | WT    |
|                               | 5' - GAAGGATAATCACCTTTGCAAGACCCGCACGA <b>TGGG</b> CTCCTTTAGACTCCATGTATGCA- 3'                     | WT               | KDM4C |
|                               | 5' - GAAGGATAATCACCTTTGCAAGACCCGCACGA <b>TGGG</b> CTCCTTTAGACTCCATGTATGCA- 3'                     | WT               | KDM4C |
| Single cell-derived clone #6  | 5' - TAGACATTTGGGAAGTTTCTAGTCCATCCCCATTAC <b>TGGC</b> CAGATTTCTCAATCTCGTCC- 3'                    | WT               | BRD4  |
|                               | 5' - TAGACATTTGGGAAGTTTCTAGTCCATCCCCATTAC <b>TGGC</b> CAGATTTCTCAATCTCGTCC- 3'                    | WT               | WT    |
|                               | 5' - GAAGGATAATCACCTTTGCAAGACCCGC <b>AA</b> GA <b>TGGG</b> CTCCTTTAGACTCCATGTATGCA- 3'            | 1 mut.; +1 bp    | KDM4C |
|                               | 5' - GAAGGATAATCACCTTTGCAAGACCCGC <b>AA</b> CGA <b>TGGG</b> CTCCTTTAGACTCCATGTATGCA- 3'           | +1 bp            | KDM4C |
| Single cell-derived clone #7  | 5' - TAGACATTTGGGAAGTTTCTAGTCCATCCCCATTAC <b>TGGC</b> CAGATTTCTCAATCTCGTCC- 3'                    | WT               | BRD4  |
|                               | 5' - TAGACATTTGGGAAGTTTCTAGTCCATCCCCATTAC <b>TGGC</b> CAGATTTCTCAATCTCGTCC- 3'                    | WT               | WT    |
|                               | 5' - GAAGGATAATCACCTTTGCAAGACCCGC <b>AA</b> CGA <b>TGGG</b> CTCCTTTAGACTCCATGTATGCA- 3'           | +1 bp            | KDM4C |
|                               | 5' - GAAGGATAATCACCTTTGCAAGAC--CGA <b>TGGG</b> CTCCTTTAGACTCCATGTATGCA- 3'                        | -5 bp            | KDM4C |
| Single cell-derived clone #8  | 5' - TAGACATTTGGGAAGTTTCTAGTCCATCCCCATTAC <b>TGGC</b> CAGATTTCTCAATCTCGTCC- 3'                    | WT               | BRD4  |
|                               | 5' - TAGACATTTGGGAAGTTTCTAGTCCATCCCCATTAC <b>TGGC</b> CAGATTTCTCAATCTCGTCC- 3'                    | WT               | WT    |
|                               | 5' - GAAGGATAATCACCTTTGCAAGACCCGCACGA <b>TGGG</b> CTCCTTTAGACTCCATGTATGCA- 3'                     | WT               | KDM4C |
|                               | 5' - GAAGGATAATCACCTTTGCAAGACCCGCACGA <b>TGGG</b> CTCCTTTAGACTCCATGTATGCA- 3'                     | WT               | KDM4C |
| Single cell-derived clone #9  | 5' - TAGACATTTGGGAAGTTTCTAGTCCATCCCCATTAC <b>TGGC</b> CAGATTTCTCAATCTCGTCC- 3'                    | WT               | BRD4  |
|                               | 5' - TAGACATTTGGGAAGTTT <b>ACATTTGGGAAGAA</b> AA <b>TA</b> T <b>TGGC</b> CAGATTTCTCAATCTCGTCC- 3' | 16 bp mut.; +1bp | WT    |
|                               | 5' - GAAGGATAATCACCTTTGCAAGACCCGC <b>AA</b> CGA <b>TGGG</b> CTCCTTTAGACTCCATGTATGCA- 3'           | +1 bp            | KDM4C |
|                               | 5' - GAAGGATAATCACCTTTGCAAGACCCGC <b>AA</b> CGA <b>TGGG</b> CTCCTTTAGACTCCATGTATGCA- 3'           | +2 bp            | KDM4C |
| Single cell-derived clone #10 | 5' - TAGACATTTGGGAAGTTTCTAGTCCATCCCCATTAC <b>TGGC</b> CAGATTTCTCAATCTCGTCC- 3'                    | WT               | BRD4  |
|                               | 5' - TAGACATTTGGGAAGTTTCTAGTCCATCCCCATTAC <b>TGGC</b> CAGATTTCTCAATCTCGTCC- 3'                    | WT               | WT    |
|                               | 5' - GAAGGATAATCACCTTTGCAAGACCCGC <b>AA</b> CGA <b>TGGG</b> CTCCTTTAGACTCCATGTATGCA- 3'           | +2 bp            | KDM4C |
|                               | 5' - GAAGGATAATCACCTTTGCAAGACCCGC <b>AA</b> CGA <b>TGGG</b> CTCCTTTAGACTCCATGTATGCA- 3'           | +1 bp            | KDM4C |
| Single cell-derived clone #11 | 5' - TAGACATTTGGGAAGTTTCTAGTCCATCCCCATTAC <b>TGGC</b> CAGATTTCTCAATCTCGTCC- 3'                    | WT               | BRD4  |
|                               | 5' - TAGACATTTGGGAAGTTTCTAGTCCATCCCCATTAC <b>TGGC</b> CAGATTTCTCAATCTCGTCC- 3'                    | WT               | WT    |
|                               | 5' - GAAGGATAATCACCTTTG <b>C</b> -----TTTAGACTCCATGTATGCA- 3'                                     | -21 bp           | KDM4C |
|                               | 5' - GAAGGATAATCACCTTTGCAAGACCCGC <b>AA</b> CGA <b>TGGG</b> CTCCTTTAGACTCCATGTATGCA- 3'           | +1 bp            | KDM4C |

**B**

**BMI1-sg2 + PHF8-sg2**

|                               |                                                                         |               |      |
|-------------------------------|-------------------------------------------------------------------------|---------------|------|
| WT                            | 5' - TTTCACAGTTTCCTACCTTATATTCAGTAGTGGTCTGGTCTTGTGAAC TTGGACATCACAA -3' |               | BMI1 |
|                               | 5' - TGACTCACAATCTCTCATGTTTTTCTGGCTTAGTGAAAAACGCCGTGGATCTTCAAAGGGG -3'  |               | PHF8 |
| Single cell-derived clone #1  | 5' - TTTCACAGTTTCCTACCTTATATTCAGTAGTGGTCTGGTCTTGTGAAC TTGGACATCACAA -3' | WT            | BMI1 |
|                               | 5' - TTTCACAGTTTCCTACCTTATATTCAGTAGTGGTCTGGTCTTGTGAAC TTGGACATCACAA -3' | WT            |      |
|                               | 5' - TGACTCACAATCTCTCATGTTTTTCTGGCTTAGTGAAAAACGCCGTGGATCTTCAAAGGGG -3'  | WT            | PHF8 |
|                               | 5' - TGACTCACAATCTCTCATGTTTTTCTGGCTTAGTGAAAAACGCCGTGGATCTTCAAAGGGG -3'  | WT            |      |
| Single cell-derived clone #2  | 5' - TTTCACAGTTTCCTACCTTATATTCAGTAGTGGTCTGGTCTTGTGAAC TTGGACATCACAA -3' | WT            | BMI1 |
|                               | 5' - TTTCACAGTTTCCTACCTTATATTCAGTAGTGGTCTGGTCTTGTGAAC TTGGACATCACAA -3' | -18 bp        |      |
|                               | 5' - TGACTCACAATCTCTCATGTTTTTCTGGCTTAGTGAAAAACGCCGTGGATCTTCAAAGGGG -3'  | +1 bp         | PHF8 |
|                               | 5' - TGACTCACAATCTCTCATGTTTTTCTGGCTTAGTGAAAAACGCCGTGGATCTTCAAAGGGG -3'  | +1 bp         |      |
| Single cell-derived clone #3  | 5' - TTTCACAGTTTCCTACCTTATATTCAGTAGTGGTCTGGTCTTGTGAAC TTGGACATCACAA -3' | WT            | BMI1 |
|                               | 5' - TTTCACAGTTTCCTACCTTATATTCAGTAGTGGTCTGGTCTTGTGAAC TTGGACATCACAA -3' | WT            |      |
|                               | 5' - TGACTCACAATCTCTCATGTTTTTCTGGCTTAGTGAAAAACGCCGTGGATCTTCAAAGGGG -3'  | WT            | PHF8 |
|                               | 5' - TGACTCACAATCTCTCATGTTTTTCTGGCTTAGTGAAAAACGCCGTGGATCTTCAAAGGGG -3'  | -3 bp         |      |
| Single cell-derived clone #4  | 5' - TTTCACAGTTTCCTACCTTATATTCAGTAGTGGTCTGGTCTTGTGAAC TTGGACATCACAA -3' | -3 bp         | BMI1 |
|                               | 5' - TTTCACAGTTTCCTACCTTATATTCAGTAGTGGTCTGGTCTTGTGAAC TTGGACATCACAA -3' | -48 bp        |      |
|                               | 5' - TGACTCACAATCTCTCATGTTTTTCTGGCTTAGTGAAAAACGCCGTGGATCTTCAAAGGGG -3'  | WT            | PHF8 |
|                               | 5' - TGACTCACAATCTCTCATGTTTTTCTGGCTTAGTGAAAAACGCCGTGGATCTTCAAAGGGG -3'  | -3 bp         |      |
| Single cell-derived clone #5  | 5' - TTTCACAGTTTCCTACCTTATATTCAGTAGTGGTCTGGTCTTGTGAAC TTGGACATCACAA -3' | -3 bp         | BMI1 |
|                               | 5' - TTTCACAGTTTCCTACCTTATATTCAGTAGTGGTCTGGTCTTGTGAAC TTGGACATCACAA -3' | -3 bp         |      |
|                               | 5' - TGACTCACAATCTCTCATGTTTTTCTGGCTTAGTGAAAAACGCCGTGGATCTTCAAAGGGG -3'  | -3 bp         | PHF8 |
|                               | 5' - TGACTCACAATCTCTCATGTTTTTCTGGCTTAGTGAAAAACGCCGTGGATCTTCAAAGGGG -3'  | -3 bp         |      |
| Single cell-derived clone #6  | 5' - TTTCACAGTTTCCTACCTTATATTCAGTAGTGGTCTGGTCTTGTGAAC TTGGACATCACAA -3' | WT            | BMI1 |
|                               | 5' - TTTCACAGTTTCCTACCTTATATTCAGTAGTGGTCTGGTCTTGTGAAC TTGGACATCACAA -3' | -13 bp        |      |
|                               | 5' - TGACTCACAATCTCTCATGTTTTTCTGGCTTAGTGAAAAACGCCGTGGATCTTCAAAGGGG -3'  | +1 bp         | PHF8 |
|                               | 5' - TGACTCACAATCTCTCATGTTTTTCTGGCTTAGTGAAAAACGCCGTGGATCTTCAAAGGGG -3'  | +1 bp         |      |
| Single cell-derived clone #7  | 5' - TTTCACAGTTTCCTACCTTATATTCAGTAGTGGTCTGGTCTTGTGAAC TTGGACATCACAA -3' | -3 bp         | BMI1 |
|                               | 5' - TTTCACAGTTTCCTACCTTATATTCAGTAGTGGTCTGGTCTTGTGAAC TTGGACATCACAA -3' | -3 bp         |      |
|                               | 5' - TGACTCACAATCTCTCATGTTTTTCTGGCTTAGTGAAAAACGCCGTGGATCTTCAAAGGGG -3'  | 1 mut.; +3 bp | PHF8 |
|                               | 5' - TGACTCACAATCTCTCATGTTTTTCTGGCTTAGTGAAAAACGCCGTGGATCTTCAAAGGGG -3'  | 1 mut.; +3 bp |      |
| Single cell-derived clone #8  | 5' - TTTCACAGTTTCCTACCTTATATTCAGTAGTGGTCTGGTCTTGTGAAC TTGGACATCACAA -3' | -6 bp         | BMI1 |
|                               | 5' - TTTCACAGTTTCCTACCTTATATTCAGTAGTGGTCTGGTCTTGTGAAC TTGGACATCACAA -3' | -10 bp        |      |
|                               | 5' - TGACTCACAATCTCTCATGTTTTTCTGGCTTAGTGAAAAACGCCGTGGATCTTCAAAGGGG -3'  | WT            | PHF8 |
|                               | 5' - TGACTCACAATCTCTCATGTTTTTCTGGCTTAGTGAAAAACGCCGTGGATCTTCAAAGGGG -3'  | WT            |      |
| Single cell-derived clone #9  | 5' - TTTCACAGTTTCCTACCTTATATTCAGTAGTGGTCTGGTCTTGTGAAC TTGGACATCACAA -3' | -2 bp         | BMI1 |
|                               | 5' - TTTCACAGTTTCCTACCTTATATTCAGTAGTGGTCTGGTCTTGTGAAC TTGGACATCACAA -3' | 1 mut.; -7 bp |      |
|                               | 5' - TGACTCACAATCTCTCATGTTTTTCTGGCTTAGTGAAAAACGCCGTGGATCTTCAAAGGGG -3'  | WT            | PHF8 |
|                               | 5' - TGACTCACAATCTCTCATGTTTTTCTGGCTTAGTGAAAAACGCCGTGGATCTTCAAAGGGG -3'  | WT            |      |
| Single cell-derived clone #10 | 5' - TTTCACAGTTTCCTACCTTATATTCAGTAGTGGTCTGGTCTTGTGAAC TTGGACATCACAA -3' | WT            | BMI1 |
|                               | 5' - TTTCACAGTTTCCTACCTTATATTCAGTAGTGGTCTGGTCTTGTGAAC TTGGACATCACAA -3' | WT            |      |
|                               | 5' - TGACTCACAATCTCTCATGTTTTTCTGGCTTAGTGAAAAACGCCGTGGATCTTCAAAGGGG -3'  | WT            | PHF8 |
|                               | 5' - TGACTCACAATCTCTCATGTTTTTCTGGCTTAGTGAAAAACGCCGTGGATCTTCAAAGGGG -3'  | WT            |      |

**C**

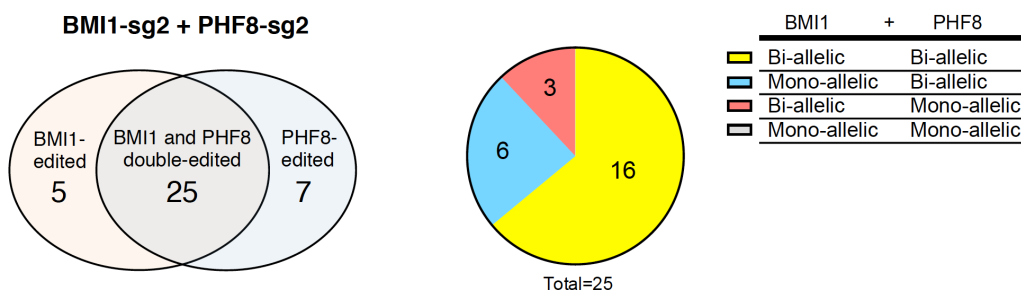

**Fig. S6. Sequencing of Targeted Alleles for Individual OVCAR8-ADR-Cas9 Cells Infected with Dual-gRNA Expression Constructs.** (A and B) OVCAR8-ADR-Cas9 cells infected with lentiviruses encoding the indicated dual-gRNA expression constructs for 12 days were plated as single cells. Genomic DNA for each single-cell-derived clone was extracted. The targeted alleles

were amplified by PCR and inserted into the TOPO vector by TA cloning for Sanger sequencing. The sequences for the two alleles of each clone are shown. Mutations and insertions are highlighted in blue, while deletions are indicated as “-”. Wildtype (WT) sequences for the targeted genes are shown as references, with the 20 bp gRNA target and PAM sequences underlined and labeled in red, respectively. (C) Venn diagram showing the frequency of single- and dual- gene-edited cells (left panel). OVCAR8-ADR-Cas9 cells harboring the indicated dual-gRNA expression constructs were plated as single cells by FACS. The targeted alleles were sequenced from 40 whole genome-amplified single cells with Illumina MiSeq. 75% (i.e., 30/40) and 80% (i.e., 32/40) of the single cells harbored at least one mutant allele at the targeted BMI1 and PHF8 loci, respectively. 62.5% (i.e., 25/40) of the single cells contained at least one mutant allele in both BMI1 and PHF8 genes. Among the 25 cells that harbored both BMI1 and PHF8 mutant alleles, 16 of them were bi-allelic mutants for both genes while the other 9 cells harbored a mono-allelic mutation for one gene and bi-allelic mutations for the other gene (right panel). The sequences for the two alleles of each single cell are shown in SI Appendix, Dataset S3. We observed similar mutant allele frequencies determined from the single-cell-derived clones by Sanger sequencing (B) and whole-genome-amplified single cells by Illumina MiSeq (C).

Fig. S7

A

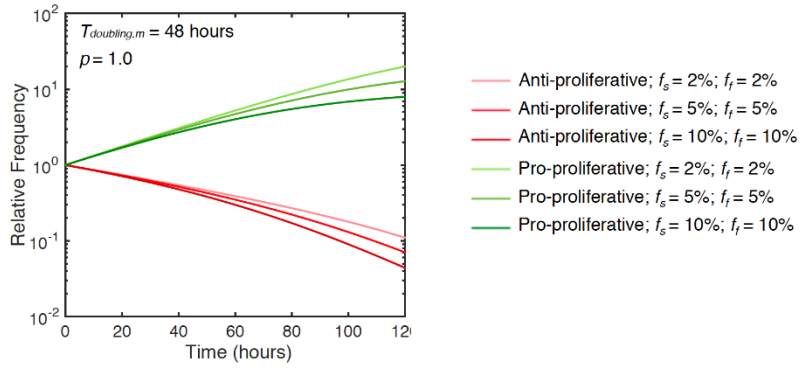

B

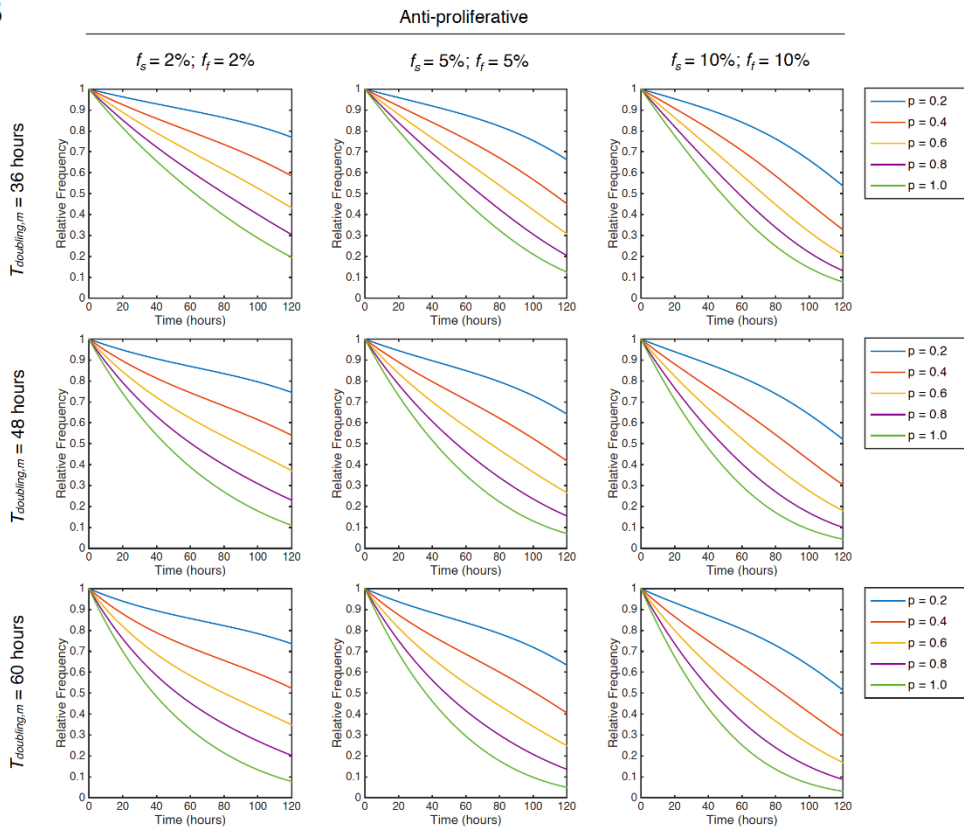

C

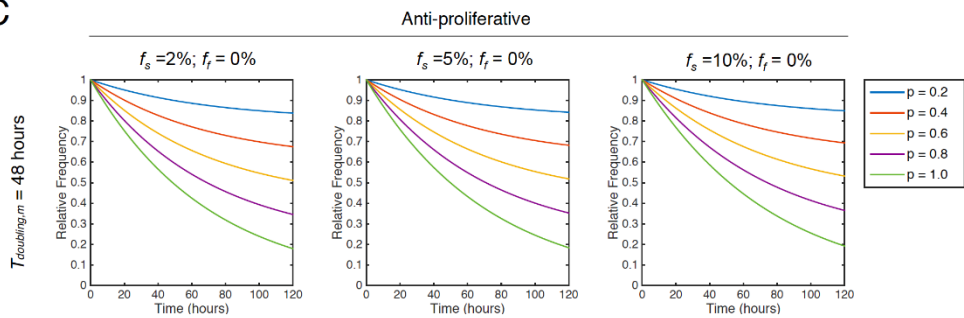

**Fig. S7. Mathematical Modeling of the Frequency of a Pro-Proliferative gRNA and an Anti-Proliferative gRNA within a Mixed Cell Population.** (A) Simulation of the relative frequencies of a pro-proliferative gRNA (green) and an anti-proliferative (red) gRNA in a cell population with different fractions (i.e., 2, 5, or 10%) of cells that contain the anti-proliferative gRNA ( $f_s$ ) and the pro-proliferative ( $f_f$ ) gRNA initially. The relative frequency is defined as the barcode abundance at a given time compared to the initial time point. In this example, the fraction of cells with the modified growth rate due to genetic perturbations by the CRISPR-Cas9 system ( $p$ ) is set as 1.0 (i.e., 100%), and the doubling time of the anti-proliferative clone ( $T_{doubling,m}$ ) is 48 hours. (B and C) Modeled relative frequencies of an anti-proliferative gRNA in a mixed cell population with regard to variations in the parameters:  $p$ ,  $T_{doubling,m}$ ,  $f_s$ , and  $f_f$ . In (A to C), the doubling time of the pro-proliferative clone is set as 12 hours. Detailed definitions are described in SI Appendix, SI Materials and Methods.



**Fig. S8**

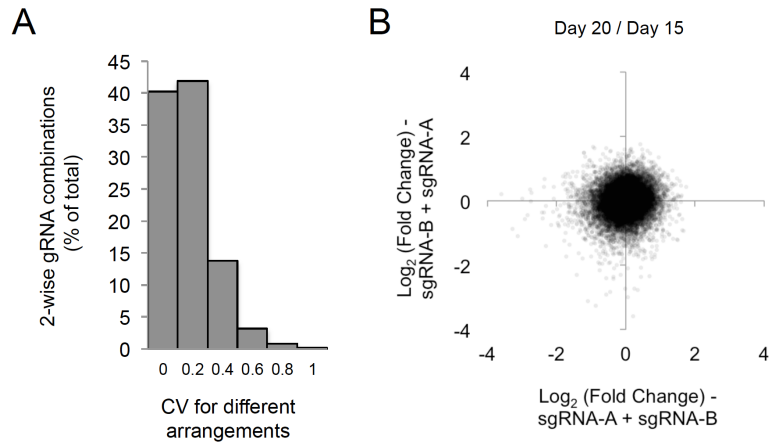

**Fig. S8. Fold-Changes in Barcodes among the Same gRNA Combinations Arranged in Different Orders in the Expression Constructs.** (A) The coefficient of variation (CV; defined as SD/mean of the fold changes of normalized barcode counts for 20-day versus 15-day cultured OVCAR8-ADR-Cas9 cells) was determined for the same two-wise gRNA combination arranged in the two possible different orders (i.e., *sgRNA-A + sgRNA-B* and *sgRNA-B + sgRNA-A*) among two biological replicates. Over 82% and 95% of two-wise gRNA combinations had a CV of <0.2 and <0.4, respectively, in the cell-proliferation screen. (B) Scatter plot showing the log<sub>2</sub> ratios of the normalized barcode counts for 20-day versus 15-day cultured cells between the same two-wise gRNA combinations arranged in the two possible different orders.

**Fig. S9**

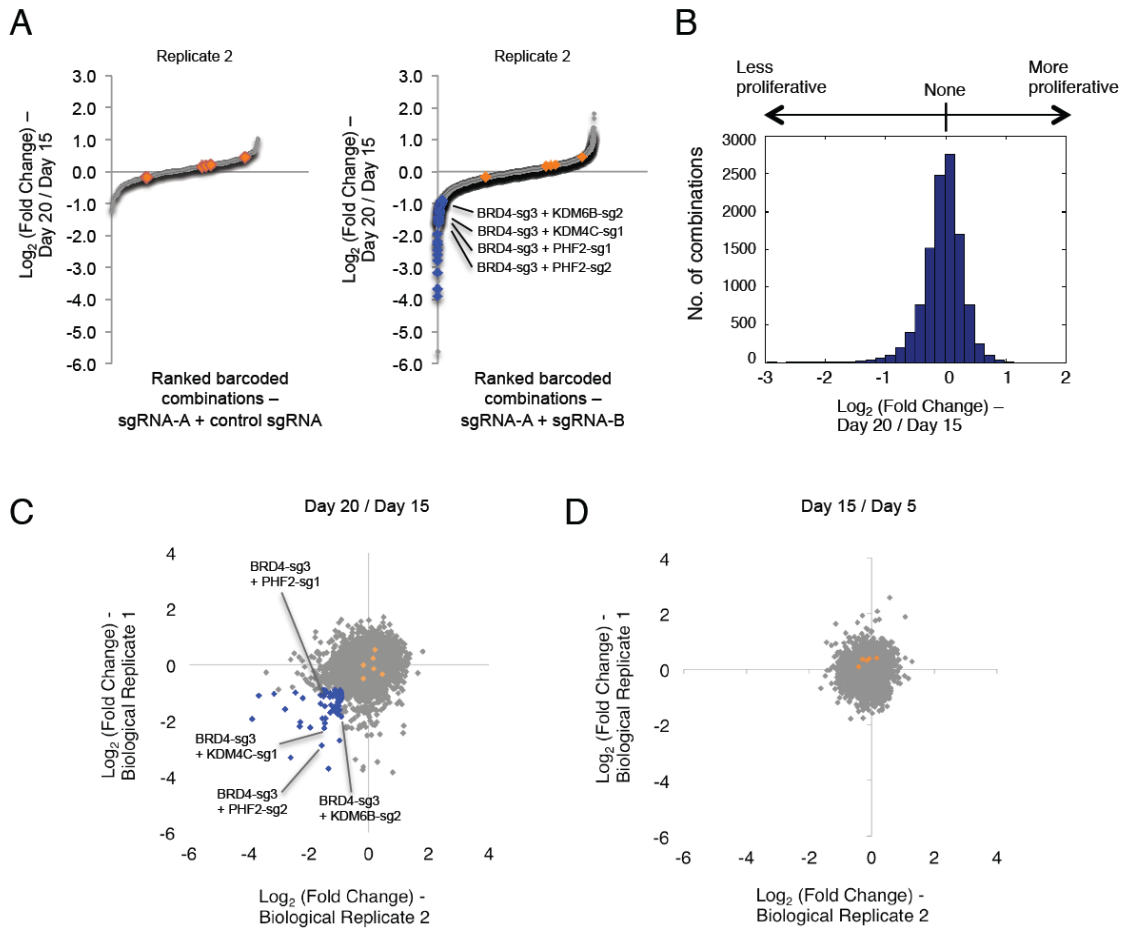

**Fig. S9. Biological Replicates and Log<sub>2</sub> Fold-Change Comparisons for the Combinatorial Screen Used to Identify gRNA Pairs that Inhibit Cancer Cell Proliferation.** (A) OVCAR8-ADR-Cas9 cells were infected with the same two-wise gRNA library used in Fig. 3B. Guide RNA pairs (right panel) and their sgRNA + control counterparts (i.e., gene-targeting sgRNA + control sgRNA; left panel) that modulated proliferation were ranked by their log<sub>2</sub> ratios of the normalized barcode count for 20-day versus 15-day cultured cells. The anti-proliferative effects of gRNA combinations that were confirmed in another biological replicate (Fig. 2B) are highlighted in blue, while combinations with control gRNA pairs are highlighted in orange. Same colors are used in panels (C) and (D). Labeled gRNA combinations were further validated in this study (Fig. 2C). (B) Frequency distribution of log<sub>2</sub> ratios for the gRNA combinations in the pooled screen. Log<sub>2</sub> ratios shown were calculated from the mean of two biological replicates. (C and D) Scatter plots showing the log<sub>2</sub> ratios of the normalized barcode counts for 20-day

versus 15-day (*C*) and 15-day versus 5-day (*D*) cultured cells between two biological replicates of OVCAR8-ADR-Cas9 cells infected with the two-wise gRNA library. Only relatively minor changes in the representation of combinations were observed between day 5 and day 15.

**Fig. S10**

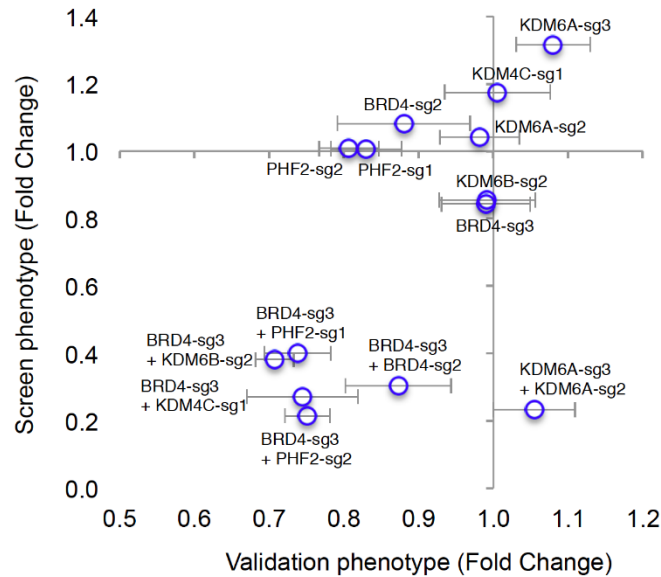

**Fig. S10. Pooled Screen and Validation Data for Individual gRNA Combinations.** For each gRNA combination, the fold-change in the normalized barcode count for 20-day versus 15-day cultured cells obtained from the pooled screening data (‘Screen phenotype’) was plotted against its relative cell viability compared to the vector control determined from the individual cell-proliferation assays (‘Validation phenotype’). The ‘Screen phenotype’ of each individual sgRNA was averaged from the fold-change of the corresponding sgRNA paired with each of the three control sgRNAs. Data for the screening data are the mean of two biological replicates, while the individual validation data represent the mean  $\pm$  SD ( $n \geq 3$ ).

Fig. S11

|                     | Guide sequence              | PAM        |          |
|---------------------|-----------------------------|------------|----------|
| KDM4C-sg1           | <b>CCTTTGCAAGACCCGCACGA</b> | <b>TGG</b> | 80.85%   |
|                     | GCTTTGCCCGAACCCGCACGA       | GAG        | 0.29%    |
|                     | CCTAGGCCAGACCTGCACGA        | TGG        | 0.23%    |
|                     | GCTCTGGAAGACCCGCACCA        | GGG        | 0.21%    |
|                     | CCTTATCAAGACCCACACCA        | GAG        | 0.15%    |
|                     |                             |            | exonic   |
| KDM6B-sg2           | <b>ATCCCCCTCCTCGTAGCGCA</b> | <b>TGG</b> | 52.74%   |
|                     | TGCGCCCTCCTCCTAGCGCA        | TGG        | 3.74%    |
|                     | CTGCCCCCTCTGGTAGCGCC        | TGG        | 1.01%    |
|                     | CTGCTCCTCCTCGTAGCGCT        | GGG        | 0.43%    |
|                     | AACCAGCTCCTCGTAGCTCA        | GGG        | 0.32%    |
|                     | AGCCCGCTCCTCGTGGGCA         | CGG        | 0.19%    |
|                     | AACGCCCTCCTCCTAGCTCA        | GGG        | 0.17%    |
|                     | CTCCTCCTCCGCGTAGCGCT        | TGG        | 0.14%    |
|                     | CTCCTCCTCCTCCTACCGCA        | AGG        | n.d.     |
|                     | ATTCCCTCCTCGTACCGCA         | AGG        | n.d.     |
| CTACCCCTCCTCCTAGACA | TAG                         | n.d.       |          |
|                     |                             |            | exonic   |
| BRD4-sg3            | <b>GGGAACAATAAAGAAGCGCT</b> | <b>TGG</b> | 61.97%   |
|                     | TGGAAAACAAAGAAGAGCT         | TGG        | 0.38%    |
|                     | GGGAAGTATAAGGAAGAGCT        | CAG        | 0.26%    |
|                     | GTGAGCAATAAAGCAGCCCT        | AAG        | 0.18%    |
|                     |                             |            | exonic   |
| BRD4-sg2            | <b>TCTAGTCCATCCCCATTAC</b>  | <b>TGG</b> | 16.65%   |
|                     | AATATTCCATTCCCCATTAC        | TGG        | 0.33%    |
|                     | TGTGTCCATAACCTCATTAC        | TGG        | 0.19%    |
|                     | TCTAGGTCATGCACCATTAC        | TGG        | 0.19%    |
|                     | TCCACACCCCTCCCCATTAC        | TAG        | 0.25%    |
| CCCATTCCTTCCCCATTAC | CAG                         | 0.21%      |          |
|                     |                             |            | intronic |

**Fig. S11. Measurement of On-Target and Off-Target Indel Generation Rates for gRNAs Targeting KDM4C, KDM6B and BRD4.** Each row represents a genomic locus corresponding to a 20 bp guide sequence (in black letters) followed by a 3 bp PAM sequence (in blue letters). Sequences in bold black letters represent the gRNA's on-target genomic sequence. Below each bold line for KDM4C-sg1, KDM6B-sg2, and BRD4-sg3 are the predicted exonic off-target genomic sequences identified using the CRISPR design(8) and CCTop(9) tools. Five exonic/intronic off-target sites predicted for BRD4-sg2 were also evaluated. Red nucleotides highlight the differences in the off-target sequences from the on-target sequence. Each genomic locus was PCR amplified from ~10,000 cells and deep sequenced with >4.2 million reads. n.d. indicates that PCR of the genomic sequence failed to provide specific amplicons for sequencing.

**Fig. S12**

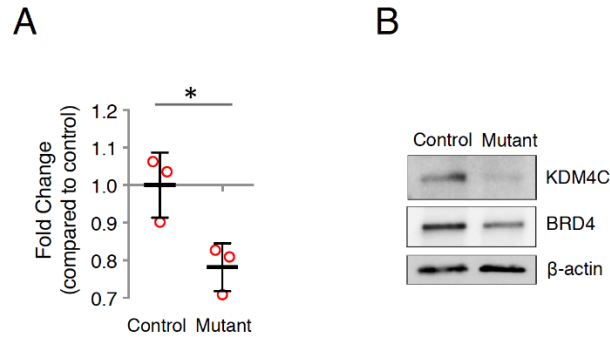

**Fig. S12. Reduced Growth in OVCAR8-ADR-Cas9 Cells Harboring Both KDM4C and BRD4 Frameshift Mutations.** (A) Cell growth assay on a single-cell-expanded OVCAR8-ADR-Cas9 mutant clone with both *KDM4C* and *BRD4* frameshift mutations (i.e., derived from Clone #3 shown in SI Appendix, Fig. S6A). Equal numbers of cells were plated and cultured for 5 days before MTT assay. Data represent mean  $\pm$  SD ( $n = 3$ ) of absorbance measurements ( $OD_{570} - OD_{650}$ ) relative to control OVCAR8-ADR-Cas9 cells. The asterisk ( $*P < 0.01$ ) represents significant difference between the control and mutant cells. (B) Immunoblot analysis of protein levels in the control and mutant cells from (A).

**Fig. S13**

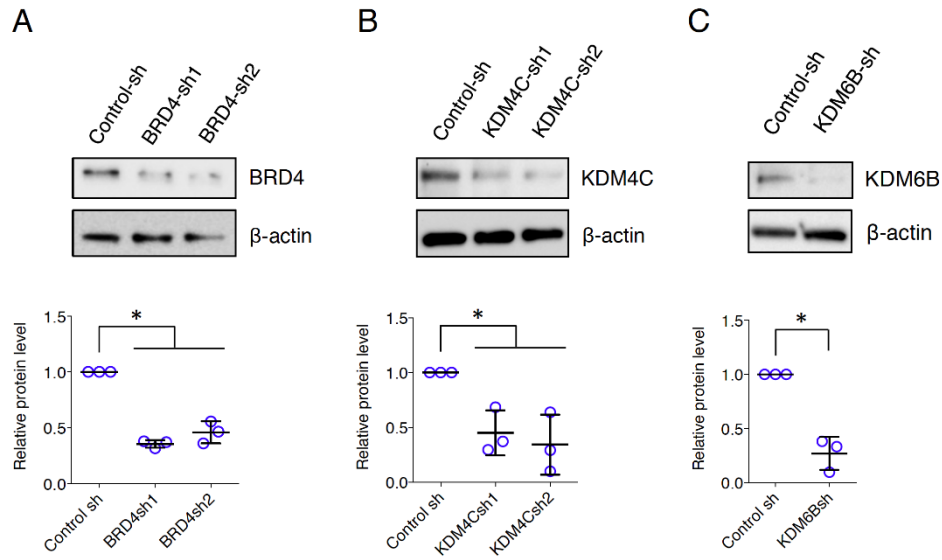

**Fig. S13. shRNA-Mediated Knockdown of Targeted Genes in OVCAR8-ADR Cells.** (A to C) Immunoblot analysis of relative protein levels in OVCAR8-ADR cells expressing control shRNA or shRNAs targeting *KDM4C*, *BRD4*, or *KDM6B*. Measured protein levels were normalized to actin levels, and then were normalized to the control shRNA samples. Data represent mean  $\pm$  SD ( $n = 3$ ). The asterisk ( $*P < 0.05$ ) represents a significant difference in protein levels between cells expressing the gene-targeting shRNA versus control shRNA.

Fig. S14

A

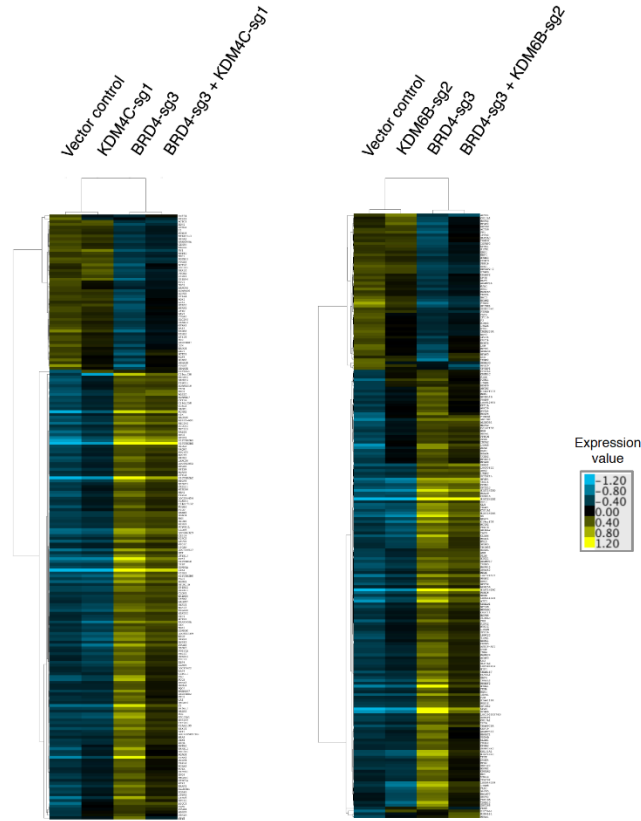

B

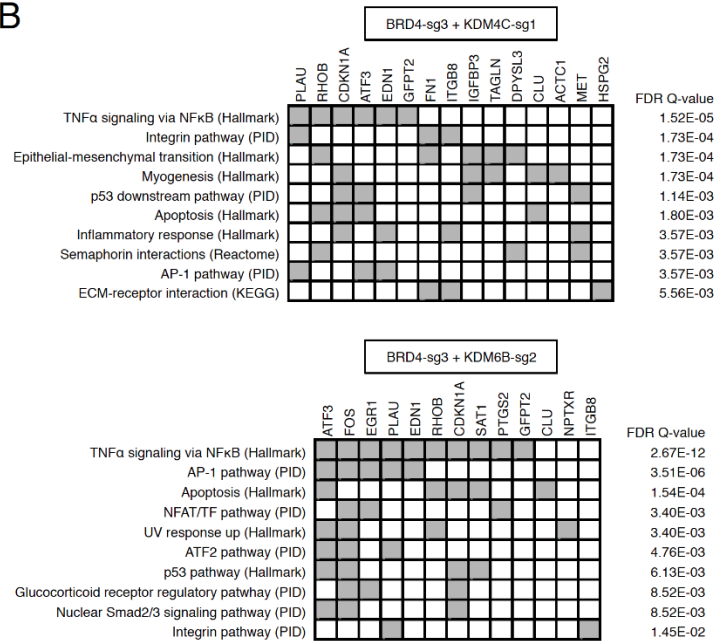



**Fig. S14. RNA-Sequencing Analysis of OVCAR8-ADR-Cas9 Cells Infected with gRNA Expression Constructs.** (A) Heatmaps showing the relative expression levels of each gene transcript (rows) in each sample (column), which were OVCAR8-ADR-Cas9 cells targeted by the respective single or dual gRNAs. Transcripts that were identified as significantly differentially expressed in OVCAR8-ADR-Cas9 cells infected with the indicated gRNA(s), when compared to the vector control, are included in the heatmaps. Expression values are  $\log_2$ -transformed FPKM measured using RNA-Seq, and mean-centered by the transcript. Hierarchical clustering of transcripts and samples was performed based on the Pearson's correlation. (B) Top ten enriched gene sets of biological processes for the differentially expressed genes identified in OVCAR8-ADR-Cas9 cells infected with the indicated gRNAs when compared to the vector control (Q-value <0.05). Subsets of the differentially expressed genes (x-axes) that are associated with the gene sets (y-axes) are shaded in grey in the tables.

**Fig. S15**

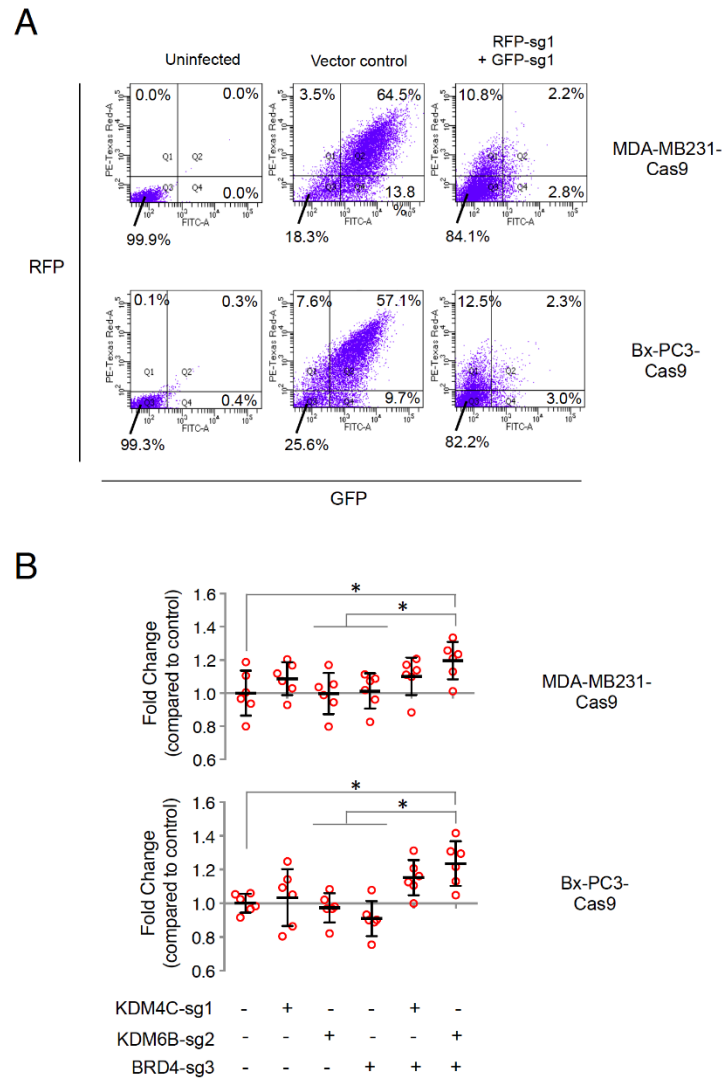

**Fig. S15. Effect of KDM4C and BRD4, as well as KDM6B and BRD4, on Cell Growth for Additional Cancer Cell Lines.** (A) Combinatorial gRNA expression constructs effectively repressed targeted fluorescence genes in breast cancer MDA-MB231-Cas9 and pancreatic cancer Bx-PC3-Cas9 cells. Lentiviral vectors that contained RFP and GFP genes expressed from constitutive promoters, with or without tandem U6 promoter-driven expression cassettes of gRNAs targeting RFP and GFP sequences, were delivered to MDA-MB231-Cas9 and Bx-PC3-Cas9 cells for analysis of GFP and RFP expression under flow cytometry. Detailed strategy is described in SI Appendix, Fig. S2. Lentiviruses encoding combinatorial gRNA expression constructs reduced the percentage of cells positive for RFP and GFP fluorescence at day 4 post-

infection. (B) MDA-MB231-Cas9 and Bx-PC3-Cas9 cells infected with lentiviruses expressing the indicated single or combinatorial gRNAs were cultured for 14 days. Equal numbers of infected cells were then re-plated and cultured for additional 5 days. Cell viabilities relative to control sgRNA were determined by the MTT assay. Data represent mean  $\pm$  SD ( $n=6$ ) from biological replicates. The asterisk ( $*P < 0.05$ ) represents significant differences between the indicated samples. These results indicate that combinatorial gRNA targeting of genes can have variable phenotypes depending on the cellular background.

**Dataset S1. sgRNA Target Sequences Used in this Study**

| <b>sgRNA ID</b> | <b>sgRNA target sequence</b> |
|-----------------|------------------------------|
| GFP-sg1         | GGGCGAGGAGCTGTTCACCG         |
| RFP-sg1         | CACCCAGACCATGAAGATCA         |
| RFP-sg2         | CCACTTCAAGTGCACATCCG         |
| NF1-sg1         | GTTGTGCTCAGTACTGACTT         |
| NF1-sg4         | TTTCAGCTTCCAATAAAAAC         |
| NF2-sg2         | ATTCCACGGGAAGGAGATCT         |
| MED12-sg1       | AGGATTGAAGCTGACGTTCT         |
| Control-sg1     | ATCGTTTCCGCTTAACGGCG         |
| Control-sg2     | AAACGGTACGACAGCGTGTG         |
| Control-sg3     | CCATCACCGATCGTGAGCCT         |
| DNMT1-sg1       | CTAGACGTCCATTCACTTCC         |
| DNMT1-sg2       | TTTCCAAACCTCGCACGCC          |
| DNMT1-sg3       | ACGTAAAGAAGAATTATCCG         |
| DNMT3A-sg1      | CCGCCCCACCTTCCGTGCCG         |
| DNMT3A-sg2      | TGGCGCTCCTCCTTGCCACG         |
| DNMT3A-sg3      | CCGCTCCGCAGCAGAGCTGC         |
| DNMT3B-sg1      | AGAGTCGCGAGCTTGATCTT         |
| DNMT3B-sg2      | ATCCGCACCCCGGAGATCAG         |
| DNMT3B-sg3      | GAAGACTCGATCCTCGTCAA         |
| DNMT3L-sg1      | AGGGATCTGCGCCCCATGTA         |
| DNMT3L-sg2      | ACTCACCTTCTATATTTTCGC        |
| DNMT3L-sg3      | CACCAAATCACGTCCATGC          |
| MBD1-sg1        | TCACCCGTAGGCAACGTGCG         |
| MBD1-sg2        | GTGTCCAGCGACGTTGCCTA         |
| MBD1-sg3        | ACGTTGTGCAAAGACTGTGCG        |
| MBD2-sg1        | CGGCGACTCCGCCATAGAGC         |
| MBD2-sg2        | GGAGCCGGTCCCTTTCCCGT         |
| MBD2-sg3        | AGTCTTGAAAGCGCATGCCA         |
| CREBBP-sg1      | AGCGGCTCTAGTATCAACCC         |
| CREBBP-sg2      | GAATCACATGACGCATTGTC         |
| CREBBP-sg3      | CCCGCAAATGACTGGTCACG         |
| EP300-sg1       | CTGTCAGAATTGCTGCGATC         |
| EP300-sg2       | CTTGGAAGACTTGCCTGAC          |
| EP300-sg3       | TAGTTCCCCTAACCTCAATA         |
| HDAC1-sg1       | ACACCATTTCGTAACGTTGCC        |
| HDAC1-sg2       | TCACTCGAGATGCGCTTGTC         |
| HDAC1-sg3       | AGAATGCTGCCGCACGCACC         |
| HDAC2-sg1       | TCCGTAATGTTGCTCGATGT         |
| HDAC2-sg2       | TCCAACATCGAGCAACATTA         |

|           |                       |
|-----------|-----------------------|
| HDAC2-sg3 | TACAACAGATCGTGTAATGA  |
| SIRT1-sg1 | GTTGACTGTGAAGCTGTACG  |
| SIRT1-sg2 | AACAGGTTGCGGGAATCCAA  |
| SIRT1-sg3 | TACCCAGAACATAGACACGC  |
| CARM1-sg1 | CTCGCCGTTTCGCGTCGCCGA |
| CARM1-sg2 | CCCGTACTCACGGCTGTAGA  |
| CARM1-sg3 | GGGCCACGTACCGTTGGGTG  |
| EZH1-sg1  | ACAGGCTTCATTGACTGAAC  |
| EZH1-sg2  | AGCTGATCAATAACTATGAT  |
| EZH1-sg3  | CCTCATCTGAGTACTGATTC  |
| EZH2-sg1  | ACACGCTTCCGCCAACAAAC  |
| EZH2-sg2  | TGCGACTGAGACAGCTCAAG  |
| EZH2-sg3  | AAAACCTCATCTCCCATATA  |
| MLL-sg1   | GTACAAATTGTACGACGGAG  |
| MLL-sg2   | GACCCCTCGGCGGTTTATAG  |
| MLL-sg3   | TATATTGCGACCACCAAAC   |
| MLL2-sg1  | CAGAGAGCACAAACGCCGCAC |
| MLL2-sg2  | GGAACCGCTGGCAGTCGCGC  |
| MLL2-sg3  | CTCCCGCTGCCCGTGTAGAC  |
| NSD1-sg1  | CTGGCTCGAGATTTAGCGCA  |
| NSD1-sg2  | AATCTGTTTCATGCGCTTACG |
| NSD1-sg3  | GATTCCAGTACCAGTACATT  |
| PRMT1-sg1 | CTCACCGTGGTCTAACTTGT  |
| PRMT1-sg2 | GGATGTCATGTCCTCAGCGT  |
| PRMT1-sg3 | TTTGACTCCTACGCACACTT  |
| PRMT2-sg1 | CGTGGATGAGTACGACCCCG  |
| PRMT2-sg2 | TCTTCTGTGCACACTATGCG  |
| PRMT2-sg3 | CTGTCCAGAAAGTGAATCGC  |
| PRMT3-sg1 | GCCATGTGCTCGTTAGCGTC  |
| PRMT3-sg2 | GCCTGACGCTAACGAGCACA  |
| PRMT3-sg3 | GAATTCATGTACTCAACTGT  |
| PRMT5-sg1 | CGGAATGCGGGGTCCGAACT  |
| PRMT5-sg2 | CAGCATAACAGCTTTATCCGC |
| PRMT5-sg3 | ATGAACTCCCTCTTGAAACG  |
| PRMT6-sg1 | ATTGTCCGGCGAGGACGTGC  |
| PRMT6-sg2 | CTTCGCCACGCGCTGTCTCA  |
| PRMT6-sg3 | GACGGTACTGGACGTGGGCG  |
| PRMT7-sg1 | CAATCCGACCACGGGGTCTG  |
| PRMT7-sg2 | GAGGTTCAAACCGCCTGCTA  |
| PRMT7-sg3 | TAAAGTCGGCTGGTGACACC  |
| SETD2-sg1 | AGTTCTTCTCGGTGTCCAAA  |

|           |                       |
|-----------|-----------------------|
| SETD2-sg2 | GACTATCAGTTCCAGAGATA  |
| SETD2-sg3 | AACTTACGAAGGAAGGTCTT  |
| KDM1A-sg1 | TTACCTTCGCCCGCTTGCGC  |
| KDM1A-sg2 | CCGGCCCTACTGTCGTGCCT  |
| KDM1A-sg3 | AGAGCCGACTTCCTCATGAC  |
| KDM1B-sg1 | CATACCGCATCGATAAGTCT  |
| KDM1B-sg2 | ATAGCCAAGACTTATCGATG  |
| KDM1B-sg3 | GAACATACCTTCTGTAGTAA  |
| KDM2A-sg1 | ACGCTACTATGAGACCCAG   |
| KDM2A-sg2 | TATGGCAGGGAGTCGTCGCA  |
| KDM2A-sg3 | GTAACGAATCCTTTCTTCTT  |
| KDM2B-sg1 | CCTCGTTCTCGTCGTATCGC  |
| KDM2B-sg2 | GCGTTACTACGAGACGCCCG  |
| KDM2B-sg3 | CTTGGTCAAGCGTCCGACTG  |
| KDM3A-sg1 | TAAATGCCGAGAGTGTCGCT  |
| KDM3A-sg2 | GTCTGTCAAACCGACTTCC   |
| KDM3A-sg3 | GATACTGCTTGGCTGTACTG  |
| KDM3B-sg1 | TCTTGTATGGGCGCCCCGTG  |
| KDM3B-sg2 | GCCTTGACTGTTACCGGCTC  |
| KDM3B-sg3 | TCCTGAGCCGTAACAGTCA   |
| KDM4A-sg1 | ACTCCGCACAGTTAAAACCA  |
| KDM4A-sg2 | GCGGAACTCTCGAACAGTCA  |
| KDM4A-sg3 | TTCCACTCACTTATCGCTAT  |
| KDM4B-sg1 | CCCCGCGTACTTCTCGCTGT  |
| KDM4B-sg2 | GTATGATGACATCGACGACG  |
| KDM4B-sg3 | TCACCAGGTACTGTACCCCG  |
| KDM4C-sg1 | CCTTTGCAAGACCCGCACGA  |
| KDM4C-sg2 | AGTAGGCTTCGTGTGATCAA  |
| KDM4C-sg3 | GTCTAAAGGAGCCCATCGTG  |
| KDM5A-sg1 | CATGAACCCCAACGTGCTAA  |
| KDM5A-sg2 | CTGGGATTCAAATAACTCGG  |
| KDM5A-sg3 | TCTCTGGTATGAAAGTGCCG  |
| KDM5B-sg1 | GTCCGCGAACTCTTCCCAGC  |
| KDM5B-sg2 | TCGAAGACCGGGCACTCGGG  |
| KDM5B-sg3 | GGACTTATTTTCAGCTTAATA |
| KDM5C-sg1 | CTTACCGCCATGACACACTT  |
| KDM5C-sg2 | GATAACAATGCGTTCGTAG   |
| KDM5C-sg3 | GGGCTACCCGAGCCCACCGA  |
| KDM5D-sg1 | GATTTACTCCTCGCGTCCAA  |
| KDM5D-sg2 | AAAGACTTACCGCGGGTGGG  |
| KDM5D-sg3 | TAAGGCCCGACATGGAACCG  |

|           |                       |
|-----------|-----------------------|
| KDM6A-sg1 | ACTGTAAACTGTAGTACCTC  |
| KDM6A-sg2 | CAGCATTATCTGCATACCAG  |
| KDM6A-sg3 | AGACTATGAGTCTAGTTTAA  |
| KDM6B-sg1 | TACCACAGCGCCCTTCGATA  |
| KDM6B-sg2 | ATCCCCCTCCTCGTAGCGCA  |
| KDM6B-sg3 | CAAAGGCTTCCCGTGCAGCG  |
| PHF2-sg1  | TTCTGCACGGGCTTGACGTC  |
| PHF2-sg2  | GACGTCAAGCCCGTGCAGAA  |
| PHF2-sg3  | CAGTGACGTCGAGAACTACG  |
| PHF8-sg1  | TCTGACGAACGTAGGGCTCC  |
| PHF8-sg2  | GGCTTAGTGAAAAACGCCG   |
| PHF8-sg3  | CCTCGCCATCATTCACTGTG  |
| BMI1-sg1  | AACGTGTATTGTTTCGTTACC |
| BMI1-sg2  | TCCTACCTTATATTCAGTAG  |
| BMI1-sg3  | AAAGGTTTACCATCAGCAGA  |
| BRD1-sg1  | CACCGTGTTCTATAGAGCCG  |
| BRD1-sg2  | CGGCGCGAGGTGGACAGCAT  |
| BRD1-sg3  | CGACTCACCGGCTGCGATCC  |
| BRD3-sg1  | CGACGTGACGTTTGCAGTGA  |
| BRD3-sg2  | CAAAGGTCGGAAGCCGGCTG  |
| BRD3-sg3  | CATCACTGCAAACGTACGTC  |
| BRD4-sg1  | ACTAGCATGTCTGCGGAGAG  |
| BRD4-sg2  | TCTAGTCCATCCCCATTAC   |
| BRD4-sg3  | GGGAACAATAAAGAAGCGCT  |
| ING1-sg1  | GAGATCGACGCGAAATACCA  |
| ING1-sg2  | TATAAATCCGCGCCCGAAAG  |
| ING1-sg3  | CCCATAACAGTTATTGCGCT  |
| ING2-sg1  | GCAGCAGCAACTGTACTCGT  |
| ING2-sg2  | GCAGCGACTCCACGCACTCA  |
| ING2-sg3  | GATCTTCAAGAAGACCCCGC  |
| ING3-sg1  | TCTCGCGCATTTCCGTGAAG  |
| ING3-sg2  | CTTACGGAATGCGCGAGA    |
| ING3-sg3  | TCGATACTGCATTTGTAATC  |
| ING4-sg1  | GCTGCTCGTGCTCGTTCCAA  |
| ING4-sg2  | CCTAGAAGGCCGGACTCAAA  |
| ING4-sg3  | GGCACTACTCATATACTCAG  |
| ING5-sg1  | GATCTGCTTCAAAGCGCGCC  |
| ING5-sg2  | CTTCCAGCTGATGCGAGAGC  |
| ING5-sg3  | GAAGTTCCTCTGAAGTTCGC  |

**Dataset S2. List of PCR Primers Used in qRT-PCR**

| Gene Name | Primer ID | Sequence                  |
|-----------|-----------|---------------------------|
| BMI1      | BMI1-F    | GGCTGCTCTTCCGGGATT        |
|           | BMI1-R    | TTGCTGGTCTCCAGGTAACG      |
| BRD1      | BRD1-F    | GTCCACATCCAAGGTCAGGA      |
|           | BRD1-R    | ATGGCCACCTGATTTCGCAA      |
| BRD3      | BRD3-F    | ACTCCAACCCCGACGAGATA      |
|           | BRD3-R    | GCTTGCTGAGAACGGTTTCC      |
| BRD4      | BRD4-F    | GTTGATGTGATTGCCGGCTC      |
|           | BRD4-R    | TTAGGCAGGACCTGTTTCGG      |
| CARM1     | CARM1-F   | TGGGCCACAACAACCTGATT      |
|           | CARM1-R   | GAGGACCCTTGGACAATCCC      |
| CREBBP    | CREBBP-F  | CTGCCAAGCCATCCTGGG        |
|           | CREBBP-R  | GGAGTCCGAGAGCAGCATAG      |
| DNMT1     | DNMT1-F   | CCATCAGGCATTCTACCAGGG     |
|           | DNMT1-R   | CACCTCACAGACGCCACATC      |
| DNMT3A    | DNMT3A-F  | CTGCCCAGGCAGCCATTAAG      |
|           | DNMT3A-R  | TGGAGGGTCAAATTCCTGGTC     |
| DNMT3B    | DNMT3B-F  | TATTGATGAGCGCACAAAGAGAGC  |
|           | DNMT3B-R  | GGGTGTTCCAGGGTAACATTGAG   |
| DNMT3L    | DNMT3L-F  | CCGGGACAACCTGAAGCATGT     |
|           | DNMT3L-R  | ACAGGTACCAGCTGGGAGGA      |
| EP300     | EP300-F   | CCCAAGTATGATCCGTGGCA      |
|           | EP300-R   | TCCAGGTTGAGCCAACCTGTC     |
| EZH1      | EZH1-F    | CCCTCTCCAACAGAACTTTATGGTA |
|           | EZH1-R    | ATCATCTCTTCTCACCATGGACT   |
| EZH2      | EZH2-F    | ACATCCTTTTCATGCAACACC     |
|           | EZH2-R    | GCTCCCTCCAAATGCTGGTA      |
| GAPDH     | GAPDH-F   | AGCCTCAAGATCATCAGCAATG    |
|           | GAPDH-R   | CAGTCTTCTGGGTGGCAGTG      |
| HDAC1     | HDAC1-F   | TCAAGCCGGTCATGTCCAAA      |
|           | HDAC1-R   | ACACTTGGCGTGTCTTTGA       |
| HDAC2     | HDAC2-F   | CCATAAAGCCACTGCCGAAGA     |
|           | HDAC2-R   | CAGCTCCAGCAACTGAACCG      |
| ING1      | ING1-F    | GGCCTAGCGCAATAACTGAGAT    |
|           | ING1-R    | GATCTTCTCGTCGCCAGC        |
| ING2      | ING2-F    | ATCCTGGCTCCGCAAACG        |
|           | ING2-R    | ACTCCATTTGTCTTGCCCGA      |
| ING3      | ING3-F    | AAGGTTCAAGTTGGCAAACCAG    |
|           | ING3-R    | AGTGTCTAATTCCAAAGATCGCCT  |
| ING4      | ING4-F    | TCAGCTCATGAGGGACCTAGA     |
|           | ING4-R    | TGCACCTTGTCTGTCACCAA      |
| ING5      | ING5-F    | GGAAAATGGTTCTGTCCACGG     |
|           | ING5-R    | TTGCGACACGAATGAAGGGA      |
| KDM1A     | KDM1A-F   | TCATTAGAAACCGCACACTGC     |
|           | KDM1A-R   | CTCGGTGGACAAGCACAGTA      |
| KDM1B     | KDM1B-F   | GCAGGCGAAGAAGAAAGCAA      |



|       |         |                            |
|-------|---------|----------------------------|
|       | KDM1B-R | TACCATCGGGAGGTGTAGCC       |
| KDM2A | KDM2A-F | TCCAAAGTGCTACCAGGAGG       |
|       | KDM2A-R | AGCATGGAAGTGGGTGAATGA      |
| KDM2B | KDM2B-F | GTGGTGA CT TGGCCAAAGAAG    |
|       | KDM2B-R | AAGTGGCACTCTCCGCACTC       |
| KDM3A | KDM3A-F | TGCCAACTCTCCACCTAACC       |
|       | KDM3A-R | GAGGACTTTGAGAGCAACCCT      |
| KDM3B | KDM3B-F | CATAGAGGGGAAAGATGGCCG      |
|       | KDM3B-R | CTGGCTCTCCACTGGCATT C      |
| KDM4A | KDM4A-F | GCGATAAGTACTGTACCCAC       |
|       | KDM4A-R | GCCGGCCAATATTCCACTCAT      |
| KDM4B | KDM4B-F | TCGCATGGAGACCAAAGCCC       |
|       | KDM4B-R | GGGATGCCTCCTCGTCACTT       |
| KDM4C | KDM4C-F | CGTACGGGTT CATGCAAGTT      |
|       | KDM4C-R | CGTTTGCTTAAGAGCACCTCC      |
| KDM5A | KDM5A-F | CTGGCCCCGAGTTATTTGA        |
|       | KDM5A-R | TCCTGTACACAGGCACACCA       |
| KDM5B | KDM5B-F | CCACAAGATCCGGCCCATAG       |
|       | KDM5B-R | CACGAGTTTGGGCCTCCAAT       |
| KDM5C | KDM5C-F | TATGCCTAAGGTCCAGGGCT       |
|       | KDM5C-R | CCTCAGGCAGTTCCAACACA       |
| KDM5D | KDM5D-F | CTCGCGTCCAAAGGCTAAATG      |
|       | KDM5D-R | ACGATCCTTGCAGATGGCTT       |
| KDM6A | KDM6A-F | TGACCAATTTACATTAGCTCCTCCA  |
|       | KDM6A-R | GCCAGCAGCCTTACGAGATA       |
| KDM6B | KDM6B-F | CCCCTCACCGCCTATCAGTA       |
|       | KDM6B-R | TCTTGAACAAGTCGGGGTTCG      |
| MBD1  | MBD1-F  | TGGTGCCAAACTGGCTACT        |
|       | MBD1-R  | GTGTCTGAGCGTCCACAGG        |
| MBD2  | MBD2-F  | ACGAATGAATGAACAGCCACG      |
|       | MBD2-R  | TGGACCAACTCCTTGAAGACC      |
| MLL   | MLL-F   | CGACAGCAAGGGCATTGGTT       |
|       | MLL-R   | AGTGAGTTCCTCTCCTCGGT       |
| MLL2  | MLL2_F  | TGTGGGTCCTGTGTCAACTG       |
|       | MLL2-R  | TTCACTATCGTCCGGCCTTT       |
| NSD1  | NSD1-F  | AGCGCCAATATCCAGAGGTT       |
|       | NSD1-R  | ATACTCATT CACAAATTCACCCTTT |
| PHF2  | PHF2-F  | GCCTCTAACCACAGCGAGAT       |
|       | PHF2-R  | AGATCCAGCCTGAGGGGATG       |
| PHF8  | PHF8-F  | ATACCAGACTTTCTAACCTTGTGGA  |
|       | PHF8-R  | CGCACACTCATGAGGCAGTA       |
| PRMT1 | PRMT1-F | GCAAGGTCATCGGGATCGAG       |
|       | PRMT1-R | GGTGTGAGCATGGACTCGT        |
| PRMT2 | PRMT2-F | GGCAGCTATGGA ACTCTGAAAC    |
|       | PRMT2-R | CCCACGTCCAGGATGACTTT       |
| PRMT3 | PRMT3-F | ACCCCAATGGACTCAGTGAA       |
|       | PRMT3-R | CAAAATCCTGAGCAAATTGTTTCAT  |
| PRMT5 | PRMT5-F | TATCTGCAGTCCCCGCTTCA       |

|       |         |                          |
|-------|---------|--------------------------|
|       | PRMT5-R | TAGATGGCCTGCTGGTACTG     |
| PRMT6 | PRMT6-F | AAGATGTCGCAGCCCAAGAA     |
|       | PRMT6-R | GGACCGAAACGTCCGAGTAG     |
| PRMT7 | PRMT7-F | ACTACCAAGGTATCCGGGCT     |
|       | PRMT7-R | GGCTTGAAAACCTCGATGGC     |
| SETD2 | SETD2-F | TAATCTCTTGGATCTGCCGCC    |
|       | SETD2-R | CCCACTGAGTCTGCCTTGTG     |
| SIRT1 | SIRT1-F | TAATCAGGTAGTTCCTCGATGTCC |
|       | SIRT1-R | AGGAGGTCAACTTCATCTTTGTCA |

**Dataset S3. Sequencing of Targeted Alleles in OVCAR8-ADR-Cas9 Single Cells Harboring BMI1-sg2 and PHF8-sg2 Expression Construct**  
(Please refer to Supplementary Excel file)

**Dataset S4. List of Two-Wise gRNA Hits that Inhibit OVCAR8-ADR Cell Proliferation Based on Pooled Screening**

| sgRNA-A   | sgRNA-B   | Log <sub>2</sub> ratio – Day 20/Day15 (Replicate 1) | Log <sub>2</sub> ratio – Day 20/Day15 (Replicate 2) | Q-value  |
|-----------|-----------|-----------------------------------------------------|-----------------------------------------------------|----------|
| BRD4_sg3  | MLL_sg3   | -2.61                                               | -3.32                                               | 7.01E-33 |
| BMI1_sg2  | HDAC2_sg3 | -3.91                                               | -1.93                                               | 3.41E-32 |
| BMI1_sg2  | KDM1B_sg3 | -1.34                                               | -3.71                                               | 1.20E-23 |
| ING3_sg3  | BMI1_sg1  | -3.68                                               | -1.11                                               | 4.57E-21 |
| BRD4_sg3  | KDM6A_sg2 | -2.30                                               | -2.20                                               | 1.52E-18 |
| BRD4_sg3  | PHF2_sg2  | -1.57                                               | -2.88                                               | 4.05E-18 |
| BMI1_sg2  | PRMT6_sg1 | -2.80                                               | -1.59                                               | 1.19E-17 |
| ING3_sg2  | KDM5A_sg2 | -2.28                                               | -2.04                                               | 3.48E-17 |
| KDM5B_sg3 | MLL_sg3   | -3.17                                               | -1.05                                               | 2.61E-16 |
| KDM6A_sg3 | KDM6A_sg2 | -1.95                                               | -2.26                                               | 2.61E-16 |
| BRD4_sg3  | KDM4C_sg1 | -1.48                                               | -2.28                                               | 7.88E-13 |
| KDM6B_sg1 | KDM3A_sg2 | -0.98                                               | -2.70                                               | 3.00E-12 |
| ING3_sg3  | KDM6A_sg2 | -1.46                                               | -2.10                                               | 2.02E-11 |
| PRMT5_sg3 | PRMT5_sg3 | -1.54                                               | -1.92                                               | 9.13E-11 |
| BRD4_sg3  | BRD4_sg2  | -2.45                                               | -1.00                                               | 1.24E-10 |
| BMI1_sg2  | NSD1_sg3  | -2.19                                               | -1.20                                               | 2.68E-10 |
| BMI1_sg2  | MBD2_sg3  | -1.44                                               | -1.93                                               | 3.94E-10 |
| BMI1_sg2  | KDM1A_sg1 | -1.62                                               | -1.40                                               | 5.85E-08 |
| KDM3A_sg2 | PRMT5_sg3 | -1.28                                               | -1.72                                               | 6.62E-08 |
| BRD4_sg3  | EP300_sg3 | -1.28                                               | -1.71                                               | 7.28E-08 |
| BMI1_sg2  | KDM3A_sg1 | -1.47                                               | -1.48                                               | 1.32E-07 |
| BRD4_sg3  | KDM6B_sg1 | -1.20                                               | -1.64                                               | 5.58E-07 |
| PHF8_sg2  | KDM1A_sg1 | -1.11                                               | -1.69                                               | 8.77E-07 |
| KDM6A_sg3 | HDAC2_sg3 | -1.03                                               | -1.77                                               | 8.77E-07 |
| BRD4_sg3  | KDM6B_sg2 | -0.92                                               | -1.86                                               | 1.13E-06 |
| PRMT5_sg3 | HDAC1_sg1 | -1.26                                               | -1.43                                               | 3.14E-06 |
| PHF8_sg2  | PRMT5_sg3 | -1.60                                               | -1.08                                               | 3.50E-06 |
| BRD4_sg3  | PHF2_sg1  | -1.51                                               | -1.13                                               | 5.35E-06 |
| BRD4_sg3  | EZH2_sg3  | -1.02                                               | -1.57                                               | 8.80E-06 |
| PRMT5_sg3 | EZH1_sg1  | -0.96                                               | -1.62                                               | 9.53E-06 |
| KDM6A_sg2 | KDM5A_sg2 | -1.48                                               | -1.04                                               | 1.72E-05 |
| BRD4_sg3  | KDM2B_sg2 | -1.00                                               | -1.49                                               | 2.59E-05 |
| KDM6B_sg3 | PRMT5_sg3 | -1.03                                               | -1.43                                               | 3.60E-05 |
| BRD4_sg1  | KDM6B_sg1 | -1.30                                               | -1.15                                               | 3.74E-05 |
| KDM1A_sg3 | PRMT5_sg3 | -1.52                                               | -0.91                                               | 4.81E-05 |
| PRMT5_sg3 | EP300_sg2 | -1.41                                               | -1.00                                               | 5.44E-05 |
| BRD4_sg3  | PRMT5_sg2 | -1.46                                               | -0.91                                               | 7.59E-05 |

|           |           |       |       |          |
|-----------|-----------|-------|-------|----------|
| KDM5D_sg2 | MLL_sg3   | -1.01 | -1.34 | 9.28E-05 |
| BRD4_sg3  | PRMT5_sg3 | -1.03 | -1.33 | 9.28E-05 |
| PHF2_sg1  | PRMT5_sg3 | -1.19 | -1.13 | 1.32E-04 |
| PRMT5_sg2 | DNMT1_sg1 | -1.28 | -1.02 | 1.54E-04 |
| KDM6A_sg2 | KDM5C_sg1 | -1.28 | -1.01 | 1.73E-04 |
| BMI1_sg2  | KDM6A_sg2 | -0.96 | -1.30 | 2.47E-04 |
| KDM1A_sg1 | PRMT5_sg3 | -0.95 | -1.29 | 2.68E-04 |
| BRD4_sg2  | KDM2B_sg1 | -1.06 | -1.17 | 2.82E-04 |
| KDM4A_sg2 | PRMT5_sg3 | -1.07 | -1.16 | 3.18E-04 |
| PRMT6_sg2 | PRMT5_sg2 | -1.02 | -1.13 | 6.20E-04 |
| KDM2B_sg3 | PRMT5_sg3 | -1.13 | -1.01 | 6.95E-04 |
| KDM6B_sg1 | MLL_sg3   | -0.92 | -1.19 | 9.39E-04 |
| BRD4_sg3  | BMI1_sg2  | -0.94 | -1.14 | 1.10E-03 |
| KDM5A_sg3 | NSD1_sg3  | -0.91 | -1.14 | 1.37E-03 |
| BRD4_sg3  | KDM3A_sg2 | -0.92 | -1.13 | 1.37E-03 |
| KDM6B_sg3 | PRMT7_sg3 | -1.11 | -0.90 | 1.85E-03 |
| BRD3_sg3  | KDM4C_sg1 | -0.99 | -1.01 | 2.13E-03 |
| KDM4C_sg1 | PRMT5_sg3 | -0.93 | -1.06 | 2.15E-03 |
| KDM3B_sg1 | PRMT5_sg3 | -1.00 | -0.99 | 2.15E-03 |
| PRMT5_sg2 | MBD1_sg1  | -0.94 | -1.04 | 2.47E-03 |
| EP300_sg3 | MBD1_sg3  | -0.92 | -1.03 | 2.93E-03 |
| ING3_sg1  | BRD4_sg3  | -0.99 | -0.96 | 2.93E-03 |
| KDM1A_sg1 | HDAC2_sg3 | -0.94 | -0.95 | 4.71E-03 |
| PRMT5_sg2 | CARM1_sg1 | -0.95 | -0.91 | 5.78E-03 |

### Dataset S5. Constructs Used in This Work

| Construct ID | Design                                                            |
|--------------|-------------------------------------------------------------------|
| pAWp28       | pBT264-U6p- {2xBbsI} -sgRNA scaffold- {MfeI}                      |
| pAWp28-1     | pBT264-U6p-GFP-sg1                                                |
| pAWp28-2     | pBT264-U6p-RFP-sg1                                                |
| pAWp28-3     | pBT264-U6p-RFP-sg2                                                |
| pAWp28-4     | pBT264-U6p-KDM4C-sg1                                              |
| pAWp28-5     | pBT264-U6p-PHF2-sg1                                               |
| pAWp28-6     | pBT264-U6p-KDM6B-sg2                                              |
| pAWp28-7     | pBT264-U6p-PHF2-sg2                                               |
| pAWp28-8     | pBT264-U6p-DNMT1-sg1                                              |
| pAWp28-9     | pBT264-U6p-DNMT3B-sg1                                             |
| pAWp28-10    | pBT264-U6p-PRMT2-sg3                                              |
| pAWp28-11    | pBT264-U6p-HDAC2-sg1                                              |
| pAWp28-12    | pBT264-U6p-ING4-sg1                                               |
| pAWp28-13    | pBT264-U6p-KDM1B-sg3                                              |
| pAWp28-14    | pBT264-U6p-KDM2A-sg3                                              |
| pAWp28-15    | pBT264-U6p-PRMT6-sg1                                              |
| pAWp28-16    | pBT264-U6p-BMI1-sg2                                               |
| pAWp28-17    | pBT264-U6p-PHF8-sg2                                               |
| pAWp28-18    | pBT264-U6p-BRD4-sg2                                               |
| pAWp28-19    | pBT264-U6p-BRD4-sg3                                               |
| pAWp28-20    | pBT264-U6p-KDM6A-sg2                                              |
| pAWp28-21    | pBT264-U6p-KDM6A-sg3                                              |
| pAWp28-22    | pBT264-U6p-NF1-sg1                                                |
| pAWp28-23    | pBT264-U6p-NF1-sg4                                                |
| pAWp28-24    | pBT264-U6p-NF2-sg2                                                |
| pAWp28-25    | pBT264-U6p-MED12-sg1                                              |
| pAWp9        | pFUGW-UBCp- <i>RFP</i> -CMVp- <i>GFP</i> - {BamHI+EcoRI}          |
| pAWp9-1      | pFUGW-UBCp- <i>RFP</i> -CMVp- <i>GFP</i> -U6p-GFP-sg1             |
| pAWp9-2      | pFUGW-UBCp- <i>RFP</i> -CMVp- <i>GFP</i> -U6p-RFP-sg1             |
| pAWp9-3      | pFUGW-UBCp- <i>RFP</i> -CMVp- <i>GFP</i> -U6p-RFP-sg2             |
| pAWp9-4      | pFUGW-UBCp- <i>RFP</i> -CMVp- <i>GFP</i> -U6p-RFP-sg1-U6p-GFP-sg1 |
| pAWp9-5      | pFUGW-UBCp- <i>RFP</i> -CMVp- <i>GFP</i> -U6p-RFP-sg2-U6p-GFP-sg1 |
| pAWp11       | pFUGW-CMVp                                                        |
| pAWp12       | pFUGW-CMVp- <i>GFP</i>                                            |
| pAWp12-1     | pFUGW-CMVp- <i>GFP</i> -[U6p-BRD4-sg3]-[U6p-PHF2-sg1]             |
| pAWp12-2     | pFUGW-CMVp- <i>GFP</i> -[U6p-BRD4-sg3]-[U6p-KDM6B-sg2]            |
| pAWp12-3     | pFUGW-CMVp- <i>GFP</i> -[U6p-BRD4-sg3]-[U6p-KDM4C-sg1]            |
| pAWp12-4     | pFUGW-CMVp- <i>GFP</i> -[U6p-BRD4-sg3]-[U6p-PHF2-sg2]             |
| pAWp12-5     | pFUGW-CMVp- <i>GFP</i> -[U6p-BRD4-sg3]                            |

|           |                                                         |
|-----------|---------------------------------------------------------|
| pAWp12-6  | pFUGW-CMVp- <i>GFP</i> -[U6p-KDM4C-sg1]                 |
| pAWp12-7  | pFUGW-CMVp- <i>GFP</i> -[U6p-KDM6B-sg2]                 |
| pAWp12-8  | pFUGW-CMVp- <i>GFP</i> -[U6p-DNMT1-sg1]                 |
| pAWp12-9  | pFUGW-CMVp- <i>GFP</i> -[U6p-DNMT3B-sg1]                |
| pAWp12-10 | pFUGW-CMVp- <i>GFP</i> -[U6p-PRMT2-sg3]                 |
| pAWp12-11 | pFUGW-CMVp- <i>GFP</i> -[U6p-HDAC2-sg1]                 |
| pAWp12-12 | pFUGW-CMVp- <i>GFP</i> -[U6p-ING4-sg1]                  |
| pAWp12-13 | pFUGW-CMVp- <i>GFP</i> -[U6p-KDM1B-sg3]                 |
| pAWp12-14 | pFUGW-CMVp- <i>GFP</i> -[U6p-KDM2A-sg3]                 |
| pAWp12-15 | pFUGW-CMVp- <i>GFP</i> -[U6p-PRMT6-sg1]                 |
| pAWp12-16 | pFUGW-CMVp- <i>GFP</i> -[U6p-BMI1-sg2]-[U6p-PHF8-sg2]   |
| pAWp12-17 | pFUGW-CMVp- <i>GFP</i> -[U6p-BRD4-sg2]-[U6p-KDM4C-sg1]  |
| pAWp12-18 | pFUGW-CMVp- <i>GFP</i> -[U6p-BRD4-sg3]-[U6p-BRD4-sg2]   |
| pAWp12-19 | pFUGW-CMVp- <i>GFP</i> -[U6p-KDM6A-sg3]-[U6p-KDM6A-sg2] |
| pAWp12-20 | pFUGW-CMVp- <i>GFP</i> -[U6p-KDM6A-sg2]                 |
| pAWp12-21 | pFUGW-CMVp- <i>GFP</i> -[U6p-KDM6A-sg3]                 |
| pAWp12-22 | pFUGW-CMVp- <i>GFP</i> -[U6p-BRD4-sg2]                  |
| pAWp12-23 | pFUGW-CMVp- <i>GFP</i> -[U6p-BMI1-sg2]                  |
| pAWp12-24 | pFUGW-CMVp- <i>GFP</i> -[U6p-PHF8-sg2]                  |
| pAWp12-25 | pFUGW-CMVp- <i>GFP</i> -[U6p-PHF2-sg1]                  |
| pAWp12-26 | pFUGW-CMVp- <i>GFP</i> -[U6p-PHF2-sg2]                  |
| pAWp12-27 | pFUGW-CMVp- <i>GFP</i> -[U6p-NF1-sg1]                   |
| pAWp12-28 | pFUGW-CMVp- <i>GFP</i> -[U6p-NF1-sg4]                   |
| pAWp12-29 | pFUGW-CMVp- <i>GFP</i> -[U6p-NF2-sg2]                   |
| pAWp12-30 | pFUGW-CMVp- <i>GFP</i> -[U6p-MED12-sg1]                 |
| pAWp21    | pLKO.1-Control sh                                       |
| pAWp21-1  | pLKO.1-KDM4C-sh1                                        |
| pAWp21-2  | pLKO.1-KDM4C-sh2                                        |
| pAWp21-3  | pLKO.1-KDM6B-sh                                         |
| pAWp21-4  | pLKO.1-BRD4-sh1                                         |
| pAWp21-5  | pLKO.1-BRD4-sh2                                         |
| pAWp30    | pFUGW-EFSp- <i>Cas9-P2A-Zeo</i>                         |

**Dataset S6. shRNA Antisense Sequences Used for Individual Validation Assay**

| <b>shRNA ID</b> | <b>shRNA antisense sequence</b> |
|-----------------|---------------------------------|
| Control-sh      | CGAGGGCGACTTAACCTTAGG           |
| KDM4C-sh1       | AAATCTTCGTAATCCAAGTAT           |
| KDM4C-sh2       | GTAATACCGGGTGTCCGATG            |
| KDM6B-sh        | ATTAATCCACACGAGGTCTCC           |
| BRD4-sh1        | TATAGTAATCAGGGAGGTTCA           |
| BRD4-sh2        | TTTAGACTTGATTGTGCTCAT           |



**Dataset S7. Barcode Counts for the Pooled Screen**  
(Please refer to Supplementary Excel file)

**Dataset S8. Log<sub>2</sub> Ratios Determined for Two-Wise gRNA Combinations Based on Pooled Screening**

(Please refer to Supplementary Excel file)

**Dataset S9. List of PCR Primers Used in Surveyor Assay and Sanger Sequencing for Genome Modification Detection**

| <b>Target sgRNA ID</b> | <b>Forward primer (5' to 3')</b> | <b>Reverse primer (5' to 3')</b> |
|------------------------|----------------------------------|----------------------------------|
| BMI1-sg2               | AGAAATTAACGGCTACCCTCCA           | GTTGGTACAAAGTGGTGAAGGC           |
| BRD4-sg2               | TCCATAGTGTCTTGAGCACCAC           | ACGTGGCTTCATTGTACATCCT           |
| BRD4-sg3               | CACTTGCTGATGCCAGTAGGAG           | AAGCACATGCTTCAGGCTAACA           |
| DNMT1-sg1              | GTGAATAGCTTGGGAATGTGGG           | TCATCTGCTCTTACGCTTAGCC           |
| DNMT3B-sg1             | GCCACACTCTACATGGGAGC             | CTCGGCAACCCTCCATACAT             |
| HDAC2-sg1              | GACTTTTCCATCAGGGACACCT           | AACCATGCACAGAATCCAGATTTA         |
| ING4-sg1               | GGTGGACAAACACATTCGGC             | AAGAGTTCTTGGCGCAGACA             |
| KDM1B-sg3              | CCTATCATTGCCCAAGGAGTC            | TCGTCCAAGTTACAGTCATCACA          |
| KDM2A-sg3              | CTAGGCCTCCGACAGTTGTAAT           | TCCTCTGGTGCACAGAAAAGTC           |
| KDM4C-sg1              | AGCCACCCTTGTTGGTTTT              | TTCTCTCCAGACACTGCCCT             |
| KDM6B-sg2              | GGTAAGGGAAACTCTGGGGC             | GTGCCCAGAACTACTGCCAT             |
| PHF8-sg2               | CTCCCTCCCTTCCCTAAGGCT            | GAGGTGAGTTCCAGCTTCCC             |
| PRMT2-sg3              | ATTGCCTTAAGTCGACACCTGAT          | CACCTTACAGGCACTGCGTT             |
| PRMT6-sg1              | GACTGTAGAGTTGCCGGAACAG           | CTCCCTCCCTAGAGGCTATGAG           |

**Dataset S10. List of PCR Primers Used in Deep Sequencing for Indel Detection**

| <b>Target gRNA ID</b> | <b>Type of target site</b> | <b>20 bp gRNA targeting sequence (5' to 3')</b> | <b>Forward primer (5' to 3')</b>                                         | <b>Reverse primer (5' to 3')</b>                                         |
|-----------------------|----------------------------|-------------------------------------------------|--------------------------------------------------------------------------|--------------------------------------------------------------------------|
| NF1-<br>sg1           | On-<br>target              | GTTGTGCTCAG<br>TACTGACTT                        | ACACTCTTTCCCTACAC<br>GACGCTCTTCCGATCT-<br>GGTATCTGTGGTTGATG<br>CAGTTTTCC | GTGACTGGAGTTCAGAC<br>GTGTGCTCTTCCGATCT-<br>AGTAGTGAGGCCGCTTA<br>TAACC    |
| NF1-<br>sg4           | On-<br>target              | TTTCAGCTTCC<br>AATAAAAC                         | ACACTCTTTCCCTACAC<br>GACGCTCTTCCGATCT-<br>GGTATCTGTGGTTGATG<br>CAGTTTTCC | GTGACTGGAGTTCAGAC<br>GTGTGCTCTTCCGATCT-<br>AGTAGTGAGGCCGCTTA<br>TAACC    |
| NF2-<br>sg2           | On-<br>target              | ATTCCACGGG<br>AAGGAGATCT                        | ACACTCTTTCCCTACAC<br>GACGCTCTTCCGATCT-<br>GCACAGAGCTGCTGCTT<br>GGAGTG    | GTGACTGGAGTTCAGAC<br>GTGTGCTCTTCCGATCT-<br>TAACAAGGAGATGCCCT<br>GGCTGG   |
| MED1<br>2-sg1         | On-<br>target              | AGGATTGAAG<br>CTGACGTTCT                        | ACACTCTTTCCCTACAC<br>GACGCTCTTCCGATCT-<br>CGCTTTCCTGCCTCAGG<br>ATGAAC    | GTGACTGGAGTTCAGAC<br>GTGTGCTCTTCCGATCT-<br>AGGTCATGAAGGCAAAC<br>TCAGCC   |
| PHF8-<br>sg2          | On-<br>target              | GGCTTAGTGA<br>AAAACGCCG                         | ACACTCTTTCCCTACAC<br>GACGCTCTTCCGATCT-<br>TTGGAAGAGAAGGATCT<br>GCTGAGGC  | GTGACTGGAGTTCAGAC<br>GTGTGCTCTTCCGATCT-<br>CACCTGTCAAAGTCTCT<br>ACTCCGG  |
| BMI-<br>sg2           | On-<br>target              | TCCTACCTTAT<br>ATTCAGTAG                        | ACACTCTTTCCCTACAC<br>GACGCTCTTCCGATCT-<br>GCTACCCTCCACAAAGC<br>ACACAC    | GTGACTGGAGTTCAGAC<br>GTGTGCTCTTCCGATCT-<br>CCTGGAGACCAGCAAGT<br>ATTGTCC  |
| KDM4<br>C-sg1         | On-<br>target              | CCTTTGCAAG<br>ACCCGCACGA                        | ACACTCTTTCCCTACAC<br>GACGCTCTTCCGATCT-<br>CCTTCAGAAACAATGTC<br>CCAAATCG  | GTGACTGGAGTTCAGAC<br>GTGTGCTCTTCCGATCT-<br>GTCCTCTGAACCCAGC<br>TGTAAG    |
| KDM4<br>C-sg1         | Off-<br>target             | GCTTTGCCCGA<br>ACCCGCACGA                       | ACACTCTTTCCCTACAC<br>GACGCTCTTCCGATCT-<br>AGCCTTTCTGAGAGCGG<br>GCTAG     | GTGACTGGAGTTCAGAC<br>GTGTGCTCTTCCGATCT-<br>CAAACAGAGGCCAAAG<br>GGTGTCCC  |
| KDM4<br>C-sg1         | Off-<br>target             | CCTAGGCCAG<br>ACCTGCACGA                        | ACACTCTTTCCCTACAC<br>GACGCTCTTCCGATCT-<br>GCCTCCTCTCATCTCTC<br>GCTTC     | GTGACTGGAGTTCAGAC<br>GTGTGCTCTTCCGATCT-<br>ACAGGAGTTCGTGGTGC<br>AGTTCTC  |
| KDM4<br>C-sg1         | Off-<br>target             | GCTCTGGAAG<br>ACCCGCACCA                        | ACACTCTTTCCCTACAC<br>GACGCTCTTCCGATCT-<br>GATTGGCTCCAAGCGGC<br>CATCAAAC  | GTGACTGGAGTTCAGAC<br>GTGTGCTCTTCCGATCT-<br>TTGTGTGAGGAACGTTG<br>ACGCTACC |
| KDM4<br>C-sg1         | Off-<br>target             | CCTTATCAAG<br>ACCCACACCA                        | ACACTCTTTCCCTACAC<br>GACGCTCTTCCGATCT-<br>TTGAACTCAAGGCTCAG<br>CCAACAGGC | GTGACTGGAGTTCAGAC<br>GTGTGCTCTTCCGATCT-<br>GAGCGTAGGTCTCTGC<br>ATGGAG    |

|               |                |                           |                                                                         |                                                                           |
|---------------|----------------|---------------------------|-------------------------------------------------------------------------|---------------------------------------------------------------------------|
| KDM6<br>B-sg2 | On-<br>target  | ATCCCCCTCCT<br>CGTAGCGCA  | ACACTCTTTCCCTACAC<br>GACGCTCTTCCGATCT-<br>CAACTCAGGCTGGATGC<br>ATCGG    | GTGACTGGAGTTCAGAC<br>GTGTGCTCTTCCGATCT-<br>CCACAGAATGACAGGA<br>ACCCATGG   |
| KDM6<br>B-sg2 | Off-<br>target | CTGCTCCTCCT<br>CGTAGCGCT  | ACACTCTTTCCCTACAC<br>GACGCTCTTCCGATCT-<br>TTGGTGGCCGCTGAGTG<br>TGTGTAC  | GTGACTGGAGTTCAGAC<br>GTGTGCTCTTCCGATCT-<br>ACTGAGCAGAGCCTAGG<br>AGGCAG    |
| KDM6<br>B-sg2 | Off-<br>target | TGCGCCCTCCT<br>CCTAGCGCA  | ACACTCTTTCCCTACAC<br>GACGCTCTTCCGATCT-<br>CAGCATGTTGACATAGC<br>GGC      | GTGACTGGAGTTCAGAC<br>GTGTGCTCTTCCGATCT-<br>TGTTGCCAGATCCAGAG<br>GCGTC     |
| KDM6<br>B-sg2 | Off-<br>target | CTCCTCCTCCG<br>CGTAGCGCT  | ACACTCTTTCCCTACAC<br>GACGCTCTTCCGATCT-<br>TGAGAGGAGATGAGTCG<br>GGGTC    | GTGACTGGAGTTCAGAC<br>GTGTGCTCTTCCGATCT-<br>AACTGGCCCAGTAGTC<br>GGAGCAG    |
| KDM6<br>B-sg2 | Off-<br>target | CTGCCCTCCT<br>GGTAGCGCC   | ACACTCTTTCCCTACAC<br>GACGCTCTTCCGATCT-<br>GACGGGTCAAAGCCTCA<br>GGAGAG   | GTGACTGGAGTTCAGAC<br>GTGTGCTCTTCCGATCT-<br>TCCTCAGAGTGTGTGGA<br>AGTGCTGG  |
| KDM6<br>B-sg2 | Off-<br>target | AACCAGCTCC<br>TCGTAGCTCA  | ACACTCTTTCCCTACAC<br>GACGCTCTTCCGATCT-<br>TTAGCTGCCAGCTCAC<br>AGTACC    | GTGACTGGAGTTCAGAC<br>GTGTGCTCTTCCGATCT-<br>AAGAGCTCCTAGGGGAG<br>GATCAG    |
| KDM6<br>B-sg2 | Off-<br>target | ACCGCCCTCCT<br>CCTAGCTCA  | ACACTCTTTCCCTACAC<br>GACGCTCTTCCGATCT-<br>GAGCCCCAAGAGCGAG<br>ACAA      | GTGACTGGAGTTCAGAC<br>GTGTGCTCTTCCGATCT-<br>TGGCAGGAGCACAGCCT<br>AAGGA     |
| KDM6<br>B-sg2 | Off-<br>target | AGCCCGCTCCT<br>CGTGGGGCA  | ACACTCTTTCCCTACAC<br>GACGCTCTTCCGATCT-<br>GGCGCTCAGAAGGCTGT<br>GCAG     | GTGACTGGAGTTCAGAC<br>GTGTGCTCTTCCGATCT-<br>ACACCCGCTCGGAGAT<br>CAACAC     |
| BRD4-<br>sg3  | On-<br>target  | GGGAACAATA<br>AAGAAGCGCT  | ACACTCTTTCCCTACAC<br>GACGCTCTTCCGATCT-<br>CCTAGGTGACACTGGAC<br>TTTTGC   | GTGACTGGAGTTCAGAC<br>GTGTGCTCTTCCGATCT-<br>CCACCCCTACATCTCAC<br>CTTGTTG   |
| BRD4-<br>sg3  | Off-<br>target | TGGA AAAACA<br>AAGAAGAGCT | ACACTCTTTCCCTACAC<br>GACGCTCTTCCGATCT-<br>AGGTTACCTCAGGCTG<br>CTCAGAAG  | GTGACTGGAGTTCAGAC<br>GTGTGCTCTTCCGATCT-<br>GTGAGGTTTCCACGTGC<br>CAGC      |
| BRD4-<br>sg3  | Off-<br>target | GGGAAGTATA<br>AGGAAGAGCT  | ACACTCTTTCCCTACAC<br>GACGCTCTTCCGATCT-<br>CGTCTCTCCATGTGA<br>GCTTGTG    | GTGACTGGAGTTCAGAC<br>GTGTGCTCTTCCGATCT-<br>CCAACAATTCCAGGTAT<br>GAAACTCCC |
| BRD4-<br>sg3  | Off-<br>target | GTGAGCAATA<br>AAGCAGCCCT  | ACACTCTTTCCCTACAC<br>GACGCTCTTCCGATCT-<br>GGAAAGATCATCTGATC<br>AGGCCATC | GTGACTGGAGTTCAGAC<br>GTGTGCTCTTCCGATCT-<br>CTCCCCACTTGTAGGTT<br>CCTAATCC  |
| BRD4-<br>sg2  | On-<br>target  | TCTAGTCCATC<br>CCCCATTAC  | ACACTCTTTCCCTACAC<br>GACGCTCTTCCGATCT-                                  | GTGACTGGAGTTCAGAC<br>GTGTGCTCTTCCGATCT-                                   |

|              |                |                          |                                                                         |                                                                          |
|--------------|----------------|--------------------------|-------------------------------------------------------------------------|--------------------------------------------------------------------------|
|              |                |                          | CTTGTTAGGGTTGGAGG<br>TCTCTGG                                            | GTAGAGTGCCTGGTGAA<br>GAATGTG                                             |
| BRD4-<br>sg2 | Off-<br>target | AATATTCCATT<br>CCCCATTAC | ACACTCTTTCCCTACAC<br>GACGCTCTTCCGATCT-<br>AAGGCCCGTAAAGGGC<br>AAGTTCAG  | GTGACTGGAGTTCAGAC<br>GTGTGCTCTTCCGATCT-<br>TCCAGACTGTTGTTTCAG<br>TCCTGT  |
| BRD4-<br>sg2 | Off-<br>target | TGTTGTCCATA<br>CCTCATTAC | ACACTCTTTCCCTACAC<br>GACGCTCTTCCGATCT-<br>GGTGACAGGAAGCTGTC<br>GGAACAT  | GTGACTGGAGTTCAGAC<br>GTGTGCTCTTCCGATCT-<br>CTCTGGATTTGCCACA<br>CCTAGTC   |
| BRD4-<br>sg2 | Off-<br>target | TCTAGGTCATG<br>CACCATTAC | ACACTCTTTCCCTACAC<br>GACGCTCTTCCGATCT-<br>CTCACTGTGATCTGACA<br>CCAAACAC | GTGACTGGAGTTCAGAC<br>GTGTGCTCTTCCGATCT-<br>GCATGCTTGCTTTCTGA<br>AGGTGGC  |
| BRD4-<br>sg2 | Off-<br>target | CCCATTCCTTC<br>CCCCATTAC | ACACTCTTTCCCTACAC<br>GACGCTCTTCCGATCT-<br>CTAGTTGCCTTCATGCCT<br>TACAGAC | GTGACTGGAGTTCAGAC<br>GTGTGCTCTTCCGATCT-<br>TTCCAAGCAAGTGAGCT<br>TCAGCACC |
| BRD4-<br>sg2 | Off-<br>target | TCCACACCCTC<br>CCCCATTAC | ACACTCTTTCCCTACAC<br>GACGCTCTTCCGATCT-<br>CTGCTCCCACTCCAGAC<br>TACCC    | GTGACTGGAGTTCAGAC<br>GTGTGCTCTTCCGATCT-<br>CCACCCATGACACAGGA<br>GGG      |

**Dataset S11. List of PCR Primers Used in Whole Genome Amplification for Indel Detection**

| <b>Target<br/>sgRNA ID</b> | <b>Forward primer (5' to 3')</b>                                    | <b>Reverse primer (5' to 3')</b>                                   |
|----------------------------|---------------------------------------------------------------------|--------------------------------------------------------------------|
| BMI1-sg2                   | GTCTCGTGGGCTCGGAGATGTGTAT<br>AAGAGACAGGCTACCCTCCACAAA<br>GCACACAC   | TCGTCGGCAGCGTCAGATGTGTATA<br>AGAGACAGCCTGGAGACCAGCAAGT<br>ATTGTCC  |
| PHF8-sg2                   | GTCTCGTGGGCTCGGAGATGTGTAT<br>AAGAGACAGTTGGAAGAGAAGGAT<br>CTGCTGAGGC | TCGTCGGCAGCGTCAGATGTGTATA<br>AGAGACAGCACCTGTCAAAAAGTCCT<br>ACTCCGG |

## Supporting Information References

1. Moffat J, et al. (2006) A Lentiviral RNAi Library for Human and Mouse Genes Applied to an Arrayed Viral High-Content Screen. *Cell* 124:1283–1298.
2. Shalem O, et al. (2014) Genome-scale CRISPR-Cas9 knockout screening in human cells. *Science* 343:84–7.
3. Bassik MC, et al. (2013) A systematic mammalian genetic interaction map reveals pathways underlying ricin susceptibility. *Cell* 152:909–922.
4. Storey JD, Tibshirani R (2003) Statistical significance for genomewide studies. *Proc Natl Acad Sci U S A* 100:9440–9445.
5. Bliss CI (1939) The toxicity of poisons applied jointly. *Ann Appl Biol* 26:585–615.
6. Borisy AA, et al. (2003) Systematic discovery of multicomponent therapeutics. *Proc Natl Acad Sci U S A* 100:7977–7982.
7. Wong ASL, Choi GCG, Cheng AA, Purcell O, Lu TK (2015) Massively parallel high-order combinatorial genetics in human cells. *Nat Biotechnol* 33:952–961.
8. Ran FA, et al. (2013) Genome engineering using the CRISPR-Cas9 system. *Nat Protoc* 8:2281–308.
9. Stemmer M (2015) CCTop: An Intuitive, Flexible and Reliable CRISPR/Cas9 Target Prediction Tool. *PLoS One* 10(4):e0124633.
10. Kim D, et al. (2013) TopHat2: accurate alignment of transcriptomes in the presence of insertions, deletions and gene fusions. *Genome Biol* 14:R36.
11. Langmead B, Trapnell C, Pop M, Salzberg SL (2009) Ultrafast and memory-efficient alignment of short DNA sequences to the human genome. *Genome Biol* 10:R25.
12. Trapnell C, et al. (2013) Differential analysis of gene regulation at transcript resolution with RNA-seq. *Nat Biotechnol* 31:46–53.
13. Subramanian A, et al. (2005) Gene set enrichment analysis: a knowledge-based approach for interpreting genome-wide expression profiles. *Proc Natl Acad Sci U S A* 102:15545–50.
